1 **STAGdb: a 30K SNP genotyping array and Science Gateway for *Acropora* corals and**  
2 **their dinoflagellate symbionts**

3

4 Authors, affiliations:

5 Kitchen, S.A., Department of Biology, The Pennsylvania State University, University Park, PA

6 16802

7 Von Kuster, G., The Huck Institutes of the Life Sciences, The Pennsylvania State University,

8 University Park, PA 16802

9 Vasquez Kuntz, K.L., Department of Biology, The Pennsylvania State University, University

10 Park, PA 16802

11 Reich, H.G., Department of Biology, The Pennsylvania State University, University Park, PA

12 16802

13 Miller, W., Centre for Comparative Genomics and Bioinformatics, The Pennsylvania State

14 University, University Park PA 16802

15 Griffin, S., NOAA Restoration Center, 260 Guard Rd., Aguadilla, PR 00603

16 Fogarty, Nicole D. Department of Biology and Marine Biology, Center for Marine Science,

17 University of North Carolina Wilmington, Wilmington, NC 28403

18 Baums, I.B., Department of Biology, The Pennsylvania State University, University Park, PA

19 16802

20 **Running Title:** *Acropora* and symbiont SNP array

21 Keywords: *Acropora*, Symbiodiniaceae, SNP array, genotyping, Galaxy Science Gateway

22 **Corresponding Author:**

23 Iliana B. Baums

24 The Pennsylvania State University

25 208 Mueller Laboratory

26 University Park, PA, 16802

27 Tel: 814.867.0491

28 Email: baums@psu.edu

29 **Abstract:**

30 Standardized identification of genotypes is necessary in animals that reproduce asexually and  
31 form large clonal populations such as coral. We developed a high-resolution hybridization-based  
32 genotype array coupled with an analysis workflow and database for the most speciose genus of  
33 coral, *Acropora*, and their symbionts. We designed the array to co-analyze host and symbionts  
34 based on bi-allelic single nucleotide polymorphisms (SNP) markers identified from genomic data  
35 of the two Caribbean *Acropora* species as well as their dominant dinoflagellate symbiont,  
36 *Symbiodinium 'fitti'*. SNPs were selected to resolve multi-locus genotypes of host (called  
37 genets) and symbionts (called strains), distinguish host populations and determine ancestry of the  
38 coral hybrids in Caribbean acroporids. Pacific acroporids can also be genotyped using a subset of  
39 the SNP loci and additional markers enable the detection of symbionts belonging to the genera  
40 *Breviolum*, *Cladocopium*, and *Durusdinium*. Analytic tools to produce multi-locus genotypes of  
41 hosts based on these SNP markers were combined in a workflow called the Standard Tools for  
42 Acroporid Genotyping (STAG). In the workflow the user's data is compared to the database of  
43 previously genotyped samples and generates a report of genet identification. The STAG  
44 workflow and database are contained within a customized Galaxy environment  
45 (<https://coralsnp.science.psu.edu/galaxy/>), which allows for consistent identification of host  
46 genet and symbiont strains and serves as a template for the development of arrays for additional  
47 coral genera. STAG data can be used to track temporal and spatial changes of sampled genets  
48 necessary for restoration planning as well as be applied to downstream genomic analyses.

## 49 **Introduction**

50 Genotype identification and tracking are required for well-replicated basic research  
51 experiments and in applied research such as designing restoration projects. High-resolution  
52 genetic tools are necessary for large clonal populations where genets can only be delineated via  
53 genotyping. The advent of reduced representation sequencing methods such as Genotype-By-  
54 Sequencing (GBS) or Restriction-site Associated DNA Sequencing (RADseq) have made it  
55 possible to assay a large number of single-nucleotide polymorphism (SNP) loci in any organism  
56 at a reasonable cost (Altshuler et al. 2000). These methods are widely used in population  
57 genomics but have the disadvantage that the SNP loci are anonymous. Thus, there is no  
58 guarantee that the same set of SNP loci will be recovered from each sample within an experiment  
59 or between experiments, making it more difficult to design standardized workflows. To  
60 circumvent this issue, standardized SNP probes can be designed for reproducible genotyping and  
61 analysis from hundreds of samples using modified RAD-based approaches like Rapture (Ali et  
62 al. 2016), RADcap (Hoffberg et al. 2016), and quaddRAD (Franchini et al. 2017) or using  
63 hybridization-based SNP genotyping arrays. Hybridization-based SNP arrays tend to have lower  
64 error rates than RADseq methods (Darrier et al. 2019; Palti et al. 2015) and thus increased  
65 accuracy of genet identification and tracking. However, both approaches forgo discovery of new  
66 SNP loci in favor of assaying a standard set of probes across all samples resulting in some  
67 ascertainment bias (Moragues et al. 2010; Malomane et al. 2018; Lachance and Tishkoff 2013).

68 When it comes to the analysis of SNP genotyping data, familiarity with computer  
69 programming and access to high performance computing is typically required but not always  
70 available. Because genotyping arrays contain a known set of SNP loci, standardized workflows  
71 can be designed easily. Galaxy is an open source, web-based platform for data-intensive

72 biomedical research (Afgan et al. 2018) and provides the underlying framework for Science  
73 Gateways. Science Gateways are extensions of cyberinfrastructure, like Galaxy, that focus on a  
74 specific scientific communities' needs by providing digital interfaces of computational resources  
75 which lowers the barriers (know-how and cost) often associated with these resources. The use of  
76 a standardized workflow within a Scientific Gateway enables scientists and restoration  
77 practitioners to accurately match samples to existing genets and strains, discover novel  
78 genets/strains and track their fate across years, all from a web browser.

79 Corals, like other clonal plant and animal species, reproduce frequently via asexual  
80 fragmentation (Whitaker 2006; Miller and Ayre 2004; Stoddart 1983; Ayre and Hughes 2000;  
81 Adjeroud and Tsuchiya 1999). Over time coral genets can extend over tens of meters consisting  
82 of tens to hundreds of colonies (Foster et al. 2007; Neigel and Avise 1983; Baums et al. 2006).  
83 This leads to considerable variability in genotypic evenness and richness on small spatial scales,  
84 ranging from minimal clonal replication to reefs dominated by a single genet (Pinzón et al. 2012;  
85 Baums et al. 2006; Fig 1, Ayre and Hughes 2000; Miller and Ayre 2004). The importance of  
86 coral genets in explaining variation in growth rates and stress response is becoming increasingly  
87 clear (Parkinson and Baums 2014; Polato et al. 2013; Baums et al. 2013; Randall and Szmant  
88 2009; Meyer et al. 2009). Further, hermaphroditic corals species like the Caribbean acroporids  
89 are mainly self-incompatible, thereby requiring the presence of gametes from different genets for  
90 successful sexual reproduction (Baums et al. 2005a; Fogarty et al. 2012). For these reasons,  
91 identification of genets and preservation of genotypic diversity are conservation priorities  
92 (Baums et al. 2019).

93 Tropical corals frequently house single-celled photosynthetic algae in the family  
94 Symbiodiniaceae that provide the majority of the hosts organic carbon (Muscatine and

95 Cernichiari 1969; Davies 1991). Coral species differ in their symbiont specificity, and colonies  
96 may house several algal genera within their cells at a given time. Thus, the complex mixtures of  
97 coral and algal DNA present challenges and opportunities for the development of high-resolution  
98 co-genotyping methods. Microsatellite markers specific for certain species of algae have further  
99 revealed subspecies level strain diversity and elucidated the temporal and spatial dynamics of  
100 symbiont strain/host genet associations (Santos and Coffroth 2003; Pettay and LaJeunesse 2007;  
101 Pettay and LaJeunesse 2009; Pinzón et al. 2011; Baums et al. 2014; Wham et al. 2011; Grupstra  
102 et al. 2017; Chan et al. 2019; Andras et al. 2009), but no SNP-based markers are available yet.  
103 Given that the algal species associated with a coral colony can influence the colony's physiology,  
104 it is also of interest to researchers and practitioners to identify the dominant and any background  
105 symbionts in coral samples.

106 Corals often occur in remote locations without access to molecular laboratory and  
107 computation facilities, or require special export permits to transport tissue samples to well-  
108 equipped facilities. Thus, we aimed to develop a genotyping array designed for instruments  
109 available at most major hospitals around the world. Genotyping arrays can be processed by a  
110 sequencing facility with user supplied tissue (as well as extracted DNA; Figure 1) eliminating the  
111 need for a molecular laboratory and therefore, can be widely adopted by users without access to  
112 such facilities.

113 Here, we report the development of a SNP array and standardized analysis workflow for the  
114 most speciose genus of coral, *Acropora*. The roughly 120 *Acropora* spp. dominate shallow reefs  
115 in the Pacific and Atlantic oceans (Veron 2000; Wallace 1999). In the Caribbean, the primary  
116 shallow reef builders are *Acropora palmata* and *A. cervicornis*, which form a hybrid (commonly  
117 known as *A. prolifera*) (van Oppen et al. 2000; Vollmer and Palumbi 2002a; Lamarck 1816).

118 Because of drastic population declines, they are listed as threatened under the U.S. Endangered  
119 species act, making them the focal species in reef restoration efforts across the Caribbean.  
120 Promoting genotypic diversity within nurseries and outplanting sites is a management priority for  
121 these species. We present a ~30k SNP genotyping array that identifies host and symbiont  
122 genotypes, coral hybrid status and background symbiont genera. The array can be analyzed cost-  
123 effectively in a standardized manner using the Standard Tools for Acroporid Genotyping  
124 (STAG) within a Galaxy environment (Figure 1). We further establish a publicly available  
125 database of *Acropora* genets. This approach can serve as a template for other asexually  
126 producing species of conservation concern.

## 127 **Methods and Materials**

### 128 ***Coral collection and DNA extraction***

129 Initially samples were selected from an archival tissue collection to address technical  
130 concerns regarding: dual genotyping with enrichment of host or symbiont DNA, tissue type  
131 (sperm, larvae and adult), clone identification (multiple ramets per genet), reproducibility  
132 between labs (Baums lab and Dr. Nicole Fogarty's lab), and difference in tissue preservatives  
133 (flash frozen, non-denatured 95-100% ethanol, CHAOS buffer and DMSO). We also included  
134 several *Acropora* samples from the Pacific including *A. muricata*, *A. millepora* and *A. digitifera*  
135 (generously donated by Drs. Todd LaJeunesse, Zachary Fuller, Mikhail Matz and Stephen  
136 Palumbi). The remaining samples include archival samples collected from various locations  
137 across the geographic distribution of *A. palmata* and *A. cervicornis* and their hybrid, *A. prolifera*.  
138 Sample information can be found in Supplemental Table 1.

139 DNA extraction methods varied depending on the tissue type, sample preservative and  
140 laboratory as follows (also see Table S1). High molecular weight DNA from concentrated coral

141 sperm was extracted using the illustra Nucleon Phytopure kit (GE Healthcare Life Science,  
142 Pittsburgh, PA) following the manufacturer's instructions and eluted in nuclease-free water. For  
143 coral larvae, an individual larva was incubated in 12  $\mu$ l of lysis solution (10.8  $\mu$ l Buffer TL  
144 (Omega BioTek, Norcross, GA), 1  $\mu$ l of OB Protease Solution (Omega BioTek) and 0.2  $\mu$ l of  
145 RNase A (100 mg/ml)) for 20 min at 55 °C. An additional 38  $\mu$ l of Buffer TL was added to each  
146 sample followed by 50  $\mu$ l of phenol/chloroform/isoamyl alcohol solution (25:24:1) and gently  
147 rocked for 2 min. The samples were centrifuged for 10 min at 10,000 rpm. To the aqueous phase,  
148 50  $\mu$ l of chloroform:isoamyl alcohol (24:1) was added and mixed with gentle rocking for 2 min.  
149 The aqueous phase was recovered after 5 min centrifugation at 10,000 rpm. The DNA was  
150 precipitated with 1.5x volume of room-temperature isopropanol, 1/10 volume of 3M sodium  
151 acetate (pH=5.2) and 1  $\mu$ l of glycogen (5 mg/ml) for 10 min at room temperature followed by  
152 centrifugation at 15,000 rpm for 20 min and two rounds of washes with 70% ethanol. The pellets  
153 were resuspended in 20  $\mu$ l of low TE buffer (10 mM Tris-HCl and 0.1 mM EDTA). In the  
154 Baums lab, DNA from adult coral tissue was extracted using the Qiagen DNeasy kit (Qiagen,  
155 Valencia, CA) following the manufacturer's protocol and eluted in 100  $\mu$ l of nuclease-free water  
156 or low TE buffer. A subset of adult tissue was extracted separately by Dr. Fogarty's lab. These  
157 samples were either preserved directly in CHAOS DNA extraction buffer (Fukami et al. 2004) or  
158 ethanol and the DNA was isolated using a magnetic bead protocol (Levitan et al. 2011). These  
159 methods are referred to as a "mixed" extraction because both coral and symbiont DNA is  
160 recovered, but in unknown proportions. For enriched symbiont DNA from the coral tissue, we  
161 isolated the symbionts using a modification of Wayne's method (Wilson et al. 2002) described  
162 by Bongaerts et al. (2017). Briefly, ~3-4 coral calyces were placed in 600  $\mu$ l of nuclease-free  
163 water and vortexed on maximum speed for 1 min to remove the tissue from the coral skeleton.



164 The skeleton pieces were removed and the supernatant with the coral tissue was centrifuged for 3  
165 min at 2,500 rpm. The supernatant was removed leaving a pellet of symbiont cells. Glass beads  
166 were added to the symbiont pellet and vortexed on high for 1 min to disrupt the cell membrane.  
167 High-molecular weight DNA quality was assessed using gel electrophoresis, and yield quantified  
168 using either NanoDrop 2000 (Thermo Scientific) or PicoGreen assay (Invitrogen) for sperm and  
169 adult extractions and a Qubit fluorometer dsDNA Broad Range kit (Invitrogen) for the larval  
170 extractions.

### 171 *Coral SNP selection*

172 We previously identified 4.9 million SNPs between the two Caribbean acroporids and the  
173 Pacific acroporid *A. digitifera*, and of those 1.6 million high-quality SNPs varied between the  
174 Caribbean acroporids (Kitchen et al. 2019). To create a conservative set of SNP, we additionally  
175 called variants with freebayes v1.1.0-50-g61527c5 (Garrison and Marth 2012) using the same  
176 alignment file from the previous study and identified shared SNPs between the two variant  
177 callers with vcf-compare v0.1.14-12-gcddb80b8 (Danecek et al. 2011). From these shared SNPs,  
178 they were further refined into three informative categories: fixed, population and variable (Figure  
179 2B). The “fixed” SNPs are those variants where all 21 individuals of a given species share a  
180 nucleotide and the other 21 individuals of the other species share a different nucleotide. The  
181 fixed SNPs were filtered to a sample read depth of  $\geq 3$  and a minimum distance of 500 bp. We  
182 also retained those that we previously defined as PCR-ready ( $n= 894$ , no observed SNPs, indels,  
183 low-complexity DNA or unassembled regions within 50 bp on either side of the SNP, see  
184 (Kitchen et al. 2019). Population SNPs were identified based on pairwise comparisons of the  
185 four different collection sites (Table S2). These SNPs were filtered such that all samples from  
186 one site shared an allele with a frequency of 0.8 or greater and differed from the samples of the

187 other site with the alternative allele at a frequency of 0.8 or greater. Finally, variable SNPs were  
188 identified by filtering the SNPs to a sample read depth of  $\geq 4$ , allowing no ambiguous bases or  
189 repetitive sequences in 71 bp of flanking sequence, a minimum distance of at least 1,000 bp  
190 between surrounding SNPs, and an allele frequency between 0.5 and 0.7 for all 21 *A. palmata*  
191 samples while the variants was also observed in the *A. cervicornis* samples. SNP frequencies  
192 were calculated using `-freq` parameter with VCFtools (Danecek et al. 2011).

193 For each SNP, 35 bp of identical flanking sequence between the species was pulled from the  
194 *A. digitifera* genome assembly (NCBI: GCF\_000222465.1; Shinzato et al. (2011)) using `bedtools`  
195 `getfasta` (Quinlan and Hall 2010). These 71 nucleotide (71mer) candidate sequences were filtered  
196 through a series of similarity searches to reduce non-specific sequence capture. First, the  
197 sequences were compared to the *A. digitifera* genome assembly using BLAST v2.6.0 (`task=`  
198 `blastn`, `e-value= 1e-13`) to determine whether redundant genomic targets were present. Sequences  
199 were discarded that had a  $\geq 30$  bp match with more than one genomic location. To check for  
200 repetitive probes, a same-strand self-analysis was performed using `blastn` (`filter query sequence`  
201 `= false`, `word size = 11`, `-dust no`, `e-value = 1e-13`, `strand = both`).

202 In addition to the SNP probes, we identified non-polymorphic sequences from acroporids by  
203 extracting high-quality SNPs that were identical between the two Caribbean acroporids and  
204 different from *A. digitifera*. We required a sample read depth of  $\geq 6$  reads with a minimum  
205 distance of 1,000 bp between SNPs and no repetitive or ambiguous bases in the 35 bp flanking  
206 sequence. We searched for sequence similarity between these probes and the final acroporid  
207 probe sets using BLAST (`task= blastn`, `e-value= 1e-13`). We discarded those that had significant  
208 overlap to the array probes and randomly selected 3,000 to act as the background probes.

## 209 *Symbiont variant calling and SNP selection*

210 SNP discovery in the symbionts was accomplished by comparing our genome samples to  
211 two reference genomes, either the assembly of cultured *S. tridacnidorum* (NCBI:  
212 GCA\_003297005.1, (Shoguchi et al. 2018)) or partial assembly of the predominant symbiont of  
213 *A. palmata* and *A. cervicornis*, *S. 'fitti'* (Reich et al., unpublished), both of which belong to the  
214 genus *Symbiodinium* (ITS2-clade A3). Because the genome samples were not specifically  
215 extracted for symbiont DNA, only 15-25% of the reads mapped to the symbiont genomes  
216 reducing our ability to identify comparable number of SNPs in the symbiont as the coral. Some  
217 of the *Symbiodinium* SNPs were identified by comparing only the deep-coverage metagenome  
218 sequences of *A. palmata* and *A. cervicornis* to the genome assembly of *S. tridacnidorum*  
219 (Shoguchi et al. 2018). These SNPs were identified as fixed between the two representative  
220 Florida acroporids sampled, but it was unclear if they were fixed between the symbiont strains of  
221 the two coral species across their range, just in Florida or just between these two samples. The  
222 other *Symbiodinium* SNPs were identified by mapping the 42 re-sequenced genome samples to a  
223 draft genome assembly of *S. 'fitti'* and processed as described in (Kitchen et al. 2019). High-  
224 quality SNPs were those with quality phred score > 200 and no more than 20% missing data at a  
225 given site among all samples. The 71 bp flanking sequences were filtered through the series of  
226 blast homology searches in the same manner as the coral SNPs described above. Finally, to  
227 confirm that the probes designed for the host and symbiont did not overlap, the final set of both  
228 groups were compared to each other using blastn with an e-value threshold of 1e-13. No matches  
229 were found between the acroporid and symbiont probe sequences. For the *Symbiodinium* non-  
230 polymorphic SNVs, we extracted genomic regions from the *S. 'fitti'* scaffolds with the highest  
231 gene coverage for the *A. palmata* and *A. cervicornis* shallow genome samples. After searching

232 them against each other using blastn (task= blastn, e-value= 1e-13), a random subset of 3,000  
233 probes was selected.

234 In addition to the genotyping probes, we identified 12 SNPs in loci used to distinguish  
235 genera of Symbiodinaceae to capture potential background symbionts. The most common genera  
236 associated with tropical corals are *Symbiodinium*, *Breviolum*, *Cladocopium* and *Durisdinium* and  
237 can be distinguished by genetic markers. These loci include ribosomal (*internal transcribed*  
238 *spacer 2* and *nr28S*), mitochondrial (*COI* and *cob*), chloroplast (*cp23S* and *psbA*) and nuclear  
239 (*elongation factor 2*) markers using sequences from previously published studies (Takishita et al.  
240 2003; Pochon et al. 2012; Arif et al. 2014; LaJeunesse 2002; LaJeunesse 2001). Sequence  
241 accessions are provided in Supplemental Table S3. At least one representative sequence from  
242 each of the genera *Symbiodinium*, *Breviolum*, *Cladocopium* and *Durusdinium* for each locus was  
243 aligned with MUSCLE in Mega X (Kumar et al. 2018). SNPs were identified based on their  
244 ability to distinguish genera with enough conserved flanking sequence for probe design (Table  
245 S4).

#### 246 ***SNP validation by genotyping***

247 After filtering, 34,783 acroporid SNPs (15,644 fixed, 10,429 population and 6,050  
248 variable) and 2,661 symbiont SNPs were submitted for review by Affymetrix (Thermo Fisher,  
249 Santa Clarita, CA). Final probe construction was completed by their bioinformatics team (Table  
250 1). Every SNP locus submitted had at least one probe on the final array. For a set of high-priority  
251 SNPs, at least two probes were designed and then the remainder of the array was filled with the  
252 highest scoring SNPs until full. The final coral probe set was run through snpEff v4.3 (Cingolani  
253 et al. 2012) and the final algal probe set was compared to the respective GFF file for each  
254 *Symbiodinium* genome using bedtools intersect (Quinlan and Hall 2010) to determine genomic

255 location. The SNP density in bin sizes of 10,000 was extracted for all coral probes using  
256 VCFtools v0.1.15 (Danecek et al. 2011).

257 We worked with Affymetrix to optimize their current genotyping tools and pipeline to  
258 provide dual genotyping of the coral and symbiont in a single run. Five 96-well plates were  
259 submitted to the Affymetrix team for processing the Axiom Mini 96 custom genotype array on  
260 the GeneTitan (Thermo Fisher, Santa Clarita, CA). The raw data was analyzed using the Axiom  
261 ‘Best Practices Workflow’ (BPW) in the Axiom Analysis Suite software (Thermo Fisher, Santa  
262 Clarita, CA) for each of the five runs separately for the coral and algal probe sets, with default  
263 quality filtering thresholds. Important thresholds that identify low sample quality include the dish  
264 quality, which is the signal of the non-polymorphic probes from one individual to the next, and  
265 call rate, which is the proportion of assigned genotypes for an individual out of all tested probes.  
266 The Bayesian clustering algorithm BRLMM-P (Affymetrix 2007) was used to compute three  
267 posterior cluster locations (AA, AB, and BB) based on pre-positioned genotype cluster locations  
268 called priors. Genotype calls were made by identifying the intensity distribution, or cluster, each  
269 sample most likely belongs to with a confidence score (1 – posterior probability of the sample  
270 assignment to genotype cluster). In the case of the symbionts, because they are haploid, the algal  
271 genotyping probes were treated as mitochondrial probes with only homozygous AA or BB allele  
272 calls being valid. Five of the symbiont genera probes allowed for three clusters when multiple  
273 alleles were predicted to separate different genera (Table S4).

274 Following the analysis of the five plates, the performance of each probe was classified  
275 into six categories based on their separation of genotype clusters with SNPpolisher (Affymetrix,  
276 CA) (Table 1). These categories include Poly High Resolution, Mono High Resolution, No  
277 Minor Hom, Call Rate Below Threshold, Other and Off-Target Variant. Probes that fell under

278 ‘Poly High Resolution’ are those with resolution of three clusters (AA, AB and BB) with at least  
279 two sample having the minor allele. Probes that fell under ‘Mono High Resolution’ are those  
280 where all samples share the same allele possibly due to low minor allele frequency or sample  
281 selection on the plate. Finally, probes that fell under ‘No Minor Hom’ are those where no minor  
282 homozygous allele is observed, only AA and AB. These three categories make up the “best and  
283 recommended” probe set that was used in downstream analyses (Table S5- S7, and Figure 2C).

#### 284 *Standard Tools for Acroporid Genotyping workflow*

285 The general overview of the data conversion and genotype analysis steps are presented in  
286 Figure 3A and code for new Galaxy tools can be found at  
287 ([https://github.com/gregvonkuster/galaxy\\_tools/tree/master/tools/corals](https://github.com/gregvonkuster/galaxy_tools/tree/master/tools/corals)). The resulting genotype  
288 files from the BPW were first converted into the variant call format (VCF) using the bcftools  
289 plugin affy2vcf (<https://github.com/freeseek/gtc2vcf>). The VCF files were sorted and merged  
290 using bcftools (Figure 3A). The coral genotyping probes recommended from the BPW with the  
291 first plate were subset from the VCF of previous genome samples using VCFtools. These SNPs  
292 were marked in the INFO field that was then used for filtering after the array data was merged  
293 with the genome samples (Figure 3A, “Select” step). The Affymetrix IDs and the order of the  
294 samples were extracted from the filtered VCF using the *Affy Ids for Genotyping* tool and  
295 combined with the sample attributes from the BPW and population information in the user-  
296 supplied metadata into a new text file with the *Genotype Population Info* tool (Figure 3A).  
297 Additional population information was appended to the file from the previously genotyped  
298 samples in the database.

299 The filtered VCF, population information file and user metadata were the inputs for the  
300 *Coral Multilocus Genotype* tool, which was executed through the R environment (RCoreTeam

301 2017). The VCF file was imported and converted into the genind format by the package vcfR  
302 v1.8.0 (Knaus and Grünwald 2017). The genind contains the individual genotypes that was then  
303 converted into a genclone format utilized by poppr v2.8.3 for clone identification (Kamvar et al.  
304 2015; Kamvar et al. 2014). A distance matrix was calculated within poppr using the Prevosti's  
305 absolute genetic distance (Prevosti et al. 1975), or the number of allelic differences between two  
306 individuals. From the distance matrix, known clone mates (ramets of the same genet) or replicate  
307 extractions from the same sample (Table S1) were compared to define a threshold for genet  
308 detection. This threshold encompasses technical (ie. missing alleles, genotyping error or DNA  
309 extraction differences) and biological (ie. somatic mutation) variation. The threshold was applied  
310 using `mlg.filt` in poppr resulting in the assignment of samples to multi-locus genotype IDs, or  
311 genet IDs. Samples assigned to a genet ID with previously genotyped samples in the database  
312 took on the previous genet ID (ex. HG0000), whereas samples without matches to previously  
313 genotyped samples were assigned new genet IDs. The representative sample of the new genet ID  
314 was identified using the `clonecorrect` function in poppr.

315         The genetic distance matrix was used to calculate a neighbor-joining tree with 100  
316 bootstrap replicates using the `aboot` function in poppr. An identity-by-state analysis was  
317 performed using SNPRelate as previously described (Kitchen et al. 2019; Zheng et al. 2012). The  
318 representative sample for each genet ID ( $n=193$ , excluding the genome samples, offspring of a  
319 Curacao cross with sample ID = SWSA, and plate 9SR22844), was used to identify populations  
320 with ADMIXTURE v1.3.0 (Alexander et al. 2009) outside of the Galaxy portal. Plate 9SR22844  
321 was excluded due to higher percentage of missing data (average  $1.271 \pm 0.581\%$  out of 96  
322 samples, Figure S1E) and heterozygosity (average  $14.163 \pm 0.756\%$  in *A. palmata* and  $12.875 \pm$   
323  $1.020\%$  in *A. cervicornis*, Figure S2A) for the entire plate that contained only Puerto Rico

324 samples compared to the Puerto Rico samples on plate P9SR10076 (average missing data of  
325  $0.501 \pm 0.251\%$  out of 73 samples and average heterozygosity of  $13.801 \pm 0.626\%$  in *A.*  
326 *palmata* and  $9.623 \pm 0.446$  in *A. cervicornis*, Figure S1C). The VCF file exported from Galaxy  
327 was filtered for representative genets and loci were reduced after applying a minor allele  
328 threshold of 0.05 with VCFtools, and converted using PLINK v1.9 (Chang et al. 2015). First, all  
329 representative genets were analyzed with inferred population of  $K=2$  from 20 replicates with  
330 different random seeds to identify hybrids. Second, the two species were split from the filtered  
331 VCF. Populations of  $K$  ranging from 2 to 10 were run on each species separately over 20  
332 replicates with different random seeds. In each iteration of ADMIXTURE, the replicates were  
333 combined and merged using the CLUMPAK server (Kopelman et al. 2015).

334 To determine the species of each sample, the genotypes were extracted from the VCF file  
335 using the extract.gt tool in the vcfR package. The nominally fixed probes were filtered further  
336 based on data from three plates where allele calls shared by less than 90% of the samples of a  
337 species were removed. Missing data was calculated for the entire probe set and the fixed probe  
338 set. The percentage of heterozygous alleles (AB) and the percentage of alleles matching each  
339 species in the fixed probe set was calculated from the reference (AA) or alternative (BB) alleles  
340 assigned for the *A. cervicornis* samples. A sample was identified as *A. palmata* or *A. cervicornis*  
341 if more than 85% of the fixed alleles match the respective species. Hybrid samples were  
342 identified as having 40% or greater heterozygosity.

343 A series of tables were generated from the analysis and imported into the respective  
344 database tables using the *Update STAG Database* tool (Figure 3A). This tool parses the metadata  
345 and genet information to append new records to the postgresql database (Figure S3).



## 346 *Galaxy CoralSNP Analysis Environment*

347 The Galaxy Scientific Gateway called CoralSNP  
348 (<https://coralsnp.science.psu.edu/galaxy>) enables streamlined analysis of the Affymetrix  
349 genotype data described above to ultimately provide the user with a genet ID, converted raw  
350 genotype data, sample relatedness and hybrid status (Figure 1). A baseline set of reports  
351 (<https://coralsnp.science.psu.edu/reports>) provides various views of the data, and additional  
352 reports will be added over time.

353 The process is straightforward and shown in Figure 3B. A sample metadata file is created  
354 by the user using a template form (<http://baumslab.org/research/data/>). The metadata file  
355 contains a field where the user can choose when their data becomes publicly available, allowing  
356 a year hold. The user then uploads their raw Affymetrix data files into the Galaxy CoralSNP  
357 environment using the *Upload File* tool in the Galaxy tool panel. Next, the user selects the  
358 appropriate files as the inputs to the *Queue Genotype Workflow* tool (Figure 3B), which validates  
359 the metadata (*Validate Affy Metadata* tool), executes the CoralSNP workflow (Figure 3A) and  
360 updates a dataset that contains all previously genotyped samples as well as the STAG database  
361 (Figure S3) with the samples in the current run (*Update STAG Database* tool). From the user's  
362 perspective, the entire analysis is as simple as uploading data and specifying it as the input to  
363 execute a tool.

364 The *Queue Genotype Workflow* tool shields the complexity of the analysis from the user  
365 and performs its functions via the Galaxy REST API. The CoralSNP workflow requires access  
366 to a dataset that contains all previously genotyped samples, so the tool imports this dataset into  
367 the user's current Galaxy history from a Galaxy Data Library  
368 (<https://coralsnp.science.psu.edu/galaxy/library/list#folders/Fcba2ba6d6fdc5d84>). It is

369 imperative that the previously genotyped samples contained within this VCF file are  
370 synchronized with the previously genotyped sample records contained within the STAG  
371 database. The *Ensure Synced* tool confirms that the data contained within these two components  
372 is synchronized before proceeding. The tool makes backup copies of the VCF file and the  
373 database before updating either component. Since both components are updated, multiple  
374 simultaneous analyses cannot be performed. The *Queue genotype workflow* tool handles this by  
375 ensuring that multiple simultaneous executions are handled serially. This is done by polling the  
376 status of the first execution until it has completed. Additional simultaneous executions are  
377 queued in the order in which they were submitted. If an analysis ends in an error with either the  
378 VCF file or the database updated so that they are no longer in sync, the backup copy of the  
379 appropriate component can be used to replace the problematic one in preparation for the next  
380 run.

381         The Galaxy CoralSNP environment contains an independent tool named *Export All*  
382 *Sample Data*, which produces a tabular dataset consisting of all samples and associated metadata  
383 in the STAG database. This dataset can be saved locally for analysis within other environments.  
384 The dataset that contains all previously genotyped samples can also be downloaded from the  
385 Galaxy Data Library, providing more options for additional analyses outside of Galaxy.

386         All the code and configuration files needed for hosting a local Galaxy CoralSNP instance  
387 are available in GitHub, and the instructions for configuring the environment are here  
388 [https://github.com/gregvonkuster/galaxy\\_tools/blob/master/galaxy/README](https://github.com/gregvonkuster/galaxy_tools/blob/master/galaxy/README). The CoralSNP  
389 Science Gateway is hosted on a high-performance compute cluster environment managed by the  
390 Information Technology VM Hosting team at Pennsylvania State University.

391 ***Symbiont genotyping: strain identification and background genera detection***

392 The symbiont genotype data was analyzed in a similar manner to the coral data, but  
393 outside the Galaxy environment. Symbiont genotyping probes were identified from the BPW of  
394 all five plates after additional filtering to remove host contamination and low-resolution probes  
395 ( $n= 531$ , Table S6). The genotyping probes were subset from the full probe set using VCFtools  
396 and analyzed using a modified version of the *Coral Multilocus Genotype* tool. Notably, the  
397 ploidy was set to haploid. Because there was limited *a priori* information on the symbiont strain  
398 from microsatellite data, the distance threshold was set based on farthest and nearest threshold  
399 calculated by cutoff\_predictor in poppr. Symbiont strains were given strain IDs in the format of  
400 SG0000.

401 For multiple vs. single strain detection from a single coral sample, five classification  
402 methods were used based on signal intensities of the filtered genotyping probes for samples  
403 assigned a strain ID. The intensities for each allele of each probe was extracted from the raw  
404 CEL file using Axiom Analysis Suite. Samples with prior symbiont genotyping from 12 to 13  
405 microsatellites were used as the training set for all classification models where any sample with  
406 more than one allele per microsatellite marker was considered as containing multiple strains of *S.*  
407 '*fitti*' ( $n=17$  samples with multiple strains and  $n=11$  samples with a single strain). The remaining  
408 samples were the test set ( $n=265$ ). The two data sets were centered and scaled prior to analysis.  
409 The five classification tests included supervised learning models such as linear discriminant  
410 analysis (LDA) (MASS v7.3-51.4 R package, (Ripley 2002) , decision tree (rpart v4.1-15 R  
411 package (Therneau and Atkinson 2019), and rpart.plot v3.0.8 R package (Milborrow 2019)),  
412 random forest (caret v6.0-84 R package, (Kuhn 2008)), and naïve Bayes (caret v6.0-84 R  
413 package, (Kuhn 2008)), and semi-supervised learning model using k nearest-neighbor masking

414 30% of the training data (SSC v2.0.0 R package, (González et al. 2019)). All tests, except for the  
415 LDA, were resampled three times with 10-fold cross-validation to evaluate model fit. The results  
416 of the five tests are presented as the percent of multiple strain assignment for each genotyped  
417 sample.

418 The background genera were assigned based on the fit of three of the classification tests  
419 above: LDA, decision tree and random forest. All samples and probes were first visualized in the  
420 Axiom Analysis Suite software to identify patterns in samples with known background symbiont  
421 populations (*A. cervicornis* with *Cladocopium*:  $n= 2$  (Lirman et al. 2014), *A. cervicornis* with  
422 *Durusdinium*:  $n= 2$ , Pacific acroporids with *Cladocopium*:  $n= 20$  and *A. muricata* with  
423 *Durusdinium*:  $n= 5$  (Hoadley et al. 2019)) . Probes were filtered based on their recommended  
424 status (Table 1) and assignment of known samples above. A preliminary assignment of  
425 symbionts to genera was made for each sample based on those cluster patterns. The signal  
426 intensity for the genera probes ( $n= 18$ ) was then extracted for all samples regardless of their  
427 genotype status using the Axiom Analysis Suite. The data was split into 80% for training and  
428 20% for testing. Cross validation was performed on the decision tree and random forest models.

## 429 **Results**

430

### 431 ***Array Design and Validation***

432 We identified 1.8 million high-quality coral SNPs that varied between the genomes of 42  
433 previously sequenced *A. palmata* and *A. cervicornis* from four locations (Belize, Curacao,  
434 Florida, and U.S. Virgin Islands) using two variant callers, samtools mpileup (Li 2011) that uses  
435 likelihood scores and freebayes (Garrison and Marth 2012) that uses Bayesian posterior  
436 probabilities for variant calls. After Affymetrix filtered the 34,783 coral loci, the final array

437 contained 32,124 loci with 53,579 probes, broken down into 25,889 fixed, 17,803 population and  
438 9,887 *A. palmata* variable probes (Table 1 and Figure 2A). The majority of these variable sites  
439 are found within introns of coding sequences in the *A. digitifera* genome, followed by intergenic  
440 regions (Figure 2B).

441         When comparing two deeply-sequenced *A. palmata* and *A. cervicornis* genomes to the  
442 reference *S. tridaniornium* genome, we identified 2,657 high-quality SNPs using samtools  
443 mpileup (Li 2011). When comparing 42 coral genome samples including the two above (Kitchen  
444 et al. 2019) to the draft genome of *A. cervicornis* ‘like’ *S. fitti*, 60,946 SNPs were considered  
445 high-quality (Reich et al, In Prep). Applying similar filtering methods to identify so-called  
446 ‘fixed’ differences between strains and populations as was done in the coral, we were left with  
447 only a small fraction of SNPs. Given the status of the *S. fitti* genome analysis at the time of the  
448 array design, we submitted more probes from the first comparison than the latter (2,269 from  
449 first comparison and 380 from the second comparison). Those loci were mostly found in the  
450 intergenic regions of the *Symbiodinium* genomes (Figure 2B). Of the 2,661 symbiont loci we  
451 submitted, all were retained in the final array with 4,021 probes covering fixed ( $n=3,663$ ),  
452 population ( $n=304$ ) and genera ( $n=54$ ) categories (Table 1).

453         The recommended coral probes from the first plate were designated as the genotyping  
454 probes for the Caribbean acroporids in all subsequent analyses (Table 1). For the symbionts, all  
455 samples from the five plates that passed quality filtering ( $n=293$  samples) were re-analyzed  
456 together using the BPW. The recommended probes were reduced further after removing probes  
457 that matched draft genome assemblies of *A. palmata*, *A. cervicornis* (Kitchen, unpublished), *A.*  
458 *tenuis* (Liew et al. 2016), *A. hyacinthus* (Liew et al. 2016), and *A. millepora* (Fuller et al. 2019)  
459 with high homology (blastn, e-value  $1e-13$ ), were not classified as Poly High Resolution, and

460 had limited resolution outside of Florida samples (see Table S6). In particular, there were 146  
461 probes that only distinguish the deeply-sequenced *A. cervicornis* symbiont strain, 247 probes that  
462 only distinguish the deeply-sequenced *A. palmata* symbiont strain, and 944 probes that  
463 distinguish the Florida *A. cervicornis* symbiont strains ( $n= 36$  samples) from all the other  
464 samples. This resulted in 531 symbiont genotyping probes for downstream analysis.

465 The genotype success for each plate is presented in Table 2. The quality was first  
466 assessed by the background fluorescence of the non-polymorphic probes, or dish quality with a  
467 threshold of 82%. Then, only the samples with a call rate of 97% for the coral or symbiont  
468 probes, respectively, proceeded to the next step in the analysis. Because some of the samples  
469 were symbiont-enriched DNA or exclusively symbiont culture DNA, they failed BPW for the  
470 coral probe set. Alternatively, coral sperm and larvae failed the symbiont probe set (Table 2).  
471 Overall, Caribbean coral genotype calling was successful for samples with DNA concentrations  
472 as low as 0.064 ng/ $\mu$ l and as high 203.34 ng/ $\mu$ l (Table S1). Symbiont genotype calling worked  
473 for samples with DNA concentrations ranging from 0.23 to 203.34 ng/ $\mu$ l (Table S1).

#### 474 ***Coral genotyping via analysis portal***

475 Four hundred seventy-nine corals (out of 520) were successfully genotyped using the  
476 genotyping probe set (Table 2 and Figure 4A) in the Galaxy CoralSNP analysis environment.  
477 The missing data ranged from 0.06% to 3.22% for the samples analyzed on the array (Figure S1).  
478 Plates differed in the amount of missing data that we attributed to a batch effect of sample  
479 preparation, but not sample preservative or extraction method because these were shared  
480 between plates. A significant positive correlation was detected between percent missing data and  
481 percent heterozygosity for each species (Pearson's Correlation, *A. palmata*  $R^2 = 0.4507$ ,  $p=$   
482  $8.142e-14$ ; *A. cervicornis*  $R^2 = 0.8223$ ,  $p < 2.2e-16$ ; Figure S2A), both of which are indications

483 of sample quality. Misclassification of heterozygous calls can occur in samples with lower  
484 quality (Hong et al. 2008; Hong et al. 2012).

485         Technical variation between replicate runs of the same DNA was low with an average  
486 genetic distance of  $0.0053 \pm 0.0015$  between technical replicates (Mean  $\pm$  1 SD; samples SI-1,  
487 SI-10, SI-12, Table S8 and Figure 4B). The average pairwise genetic distance of ramets from the  
488 same genet (clone mates) within a plate was  $0.0038 \pm 0.0026$  and between plates was  $0.0079 \pm$   
489  $0.0041$  (Figure 4B). Due to the larger genetic distances between technical replicates than ramets  
490 observed within a plate, we tested for differences in the five plates. There was a significant effect  
491 of plate on the genetic distance of ramets analyzed within plate (1-way ANOVA,  $F(4,391) =$   
492  $17.58$ ,  $p = 2.81e-13$ ). Plate 9SR22843, which contained the technical replicates, had larger  
493 average pairwise genetic distances between ramets and technical replicates within the plate  
494 compared to three of the other plates (Tukey HSD, 9SR22843 was on average 0.0014 larger than  
495 9SR22844  $p = 0.0003$ ; 9SR22843 was on average 0.0015 larger than P9SR10073  $p = 0.0019$ ;  
496 9SR22843 was on average 0.0025 larger than P9SR10076  $p = 0.0000$ ).

497         The threshold for genet assignment of samples was defined using previously identified  
498 ramets, ranging from two to six ramets per genet (shared baums\_coral\_genet\_id in Table S1).  
499 The largest genetic distance within known ramets was ca. 0.0312 between a genome sample and  
500 array sample (ie. 14120\_Mixed and 4960, Table S9). We used pairwise genetic distance = 0.032  
501 as the threshold for genet assignment based on the observations above (Figure 4C). The average  
502 pairwise genetic distance among ramets was  $0.0064 \pm 0.0064$  for all genet IDs with more than  
503 one ramet and ranged from 0.0006 to 0.0312 (Table S9). Additionally, tissue from eight genets  
504 extracted in two different laboratories recovered the same genet ID, albeit with differences in  
505 DNA concentration, missing data, and percent heterozygosity of the fixed probes (Figure 4B and

506 Table S10). There was between 0.012 to 0.027 pairwise genetic distance among ramets of the  
507 same genet in this set, which is like what was observed for differences in genotyping methods  
508 (genome sequencing vs. array) and is within the genet threshold.

509 Between genet pairwise distance was on average  $0.113 \pm 0.023$  for *A. cervicornis* and  
510  $0.128 \pm 0.025$  for *A. palmata* (Figure 4C). In the case of siblings from outcrossed offspring, the  
511 genetic distance ranged from 0.047 (SWSA-140 and SWSA-124) to 0.078 (SWSA-105 and  
512 SWSA-128) with an average genetic distance of  $0.0642 \pm 0.0068$  (Figure 4C). Heterozygosity  
513 also varied by species and geographic region, ranging from 0.110 to 0.127 in *A. cervicornis* and  
514 0.132 to 0.156 in *A. palmata* (Table 3 and Figure S2B). The inbreeding coefficient  $F_{IS}$ , which  
515 calculates the proportion of alleles within an individual that are shared with the population, was  
516 highest in Belize and Florida in both species (Table 3).

517 Genet resolution was reproducible across collection years, plates and different  
518 laboratories (Figure 4B, Figure 5 and Table S10). For example, HG0127 and HG0170 were  
519 recovered from samples collected between 2005 to 2018 and run on two different plates (Figure  
520 5B). There was only one case where a genet defined via microsatellite genotyping was split into  
521 two genets as defined via SNP genotyping (blue lineage in Figure 5B). In the inverse situation,  
522 there were four cases where genets defined via microsatellite genotyping were no longer  
523 considered to be unique genets and combined with other samples defined via SNP genotyping  
524 (Table S1).

525 A Neighbor-Joining tree (Figure 5A) using the Prevosti's genetic distance and identity-  
526 by-state analysis (Figure S4) clustered the samples, first by species and then by their collection  
527 location. However, the geographic regions were not clearly delineated using these methods. We  
528 could recover population clusters using an unsupervised model-based approach with



529 ADMIXTURE (Figure 5C). After genet correction and applying a minor allele threshold of 5%,  
530 18,823, 7,019, and 6,097 coral loci remain for all three taxa (n=193 samples), *A. palmata* (n= 90  
531 samples) and *A. cervicornis* (n=64 samples), respectively The ancestry of each sample was  
532 assessed assuming two source populations for the full dataset and two to ten populations for each  
533 species separately. For K=2 of the entire dataset, the two species clearly separate with the  
534 hybrids having mixed ancestry (Figure 5C). The lowest prediction error for *A. cervicornis* was  
535 three inferred populations (Figure S5) with a population in Florida, a population in Belize and a  
536 population in USVI and Puerto Rico (Figure 5C). Three populations were also predicted in *A.*  
537 *palmata* with a population in Florida and Belize, a population in Puerto Rico and a population in  
538 the Curacao (Figures S5 and 5C).

### 539 ***Hybrid identification***

540 The genetic species assignment was based on 9,072 fixed probes. The proportion of  
541 ancestry from each parental species was calculated for each sample and used to identify hybrids  
542 (Figure 6). There were 39 *A. prolifera* hybrids of which all but one appears to be a F1 hybrid  
543 (Figure 5C and Figure 6). Based on the field calls, one hybrid detected with the array data was  
544 previously misidentified as *A. palmata* and 11 samples identified as hybrids in the field ( $n=7$   
545 larvae and  $n=4$  adults) were assigned to one of the parental species instead.

### 546 ***Symbiont Genotyping***

547 There were 293 samples that passed the BPW for the symbiont probes. Unlike the coral  
548 samples, the extraction method mattered for symbiont DNA recovery and genotyping. This is  
549 exemplified by the failure of all but one replicate DNA extractions using the magnetic bead  
550 protocol and successful genotyping of all samples after DNA extraction with the QIAGEN

551 DNeasy kit. 186 putative *S. 'fitti'* strains were identified based on a genetic distance threshold of  
552 0.0018. We call these putative strains based on the limited *a priori* information available for  
553 setting the strain detection threshold. Enriched symbiont DNA and mixed DNA extractions from  
554 the same tissue shared the same strain ID as did technical replicates of the same DNA extractions  
555 from the same ramet (Table S1).

556 Sometimes more than one strain can be present in a given host and the strain ID might  
557 represent a mixture of different *S. 'fitti'* strains. We attempted to identify colonization of single  
558 or multiple strains in a host sample through various supervised and semi-supervised  
559 classification methods using the signal intensity of the symbiont genotyping probes. The  
560 posterior probabilities of the LDA were used to determine likely colonization status for the  
561 known and unknown samples (Figure S6A). There was a difference in the distribution of the  
562 multiple and single colonized samples on LD1 (Figure S6A); however, two single strain samples  
563 overlapped the distribution of samples with multiple strains. More unknown samples overlapped  
564 with the distribution of samples with multiple strains compared to the distribution of samples  
565 with a single strain (Figure S6A). The decision tree had an accuracy of 53.6% and only required  
566 signal intensity of two probes for the classification with the lowest cross-validation error (probes  
567 AX.197983721.B and AX.198082605.A, Figure S6B). For the random forest model, the  
568 accuracy was estimated to be 66.9% with higher classification error for the single strain samples  
569 (multiple error = 29.4%, single error = 54.5%). Five trees were predicted to have the lowest error  
570 with the largest number of nodes, one of which is presented in Figure S6C. Naïve Bayes had an  
571 accuracy of 69.2% for the training data. Lastly, the semi-supervised k-nearest neighbor model  
572 had an accuracy of 65.8%. The results of all classification models were calculated as the percent  
573 agreement of multiple strains prediction (ex. 2 out of 5 tests predicted multiple strains = 40%).

574 There were 112 samples that were likely colonized by a single strain (0-20% agreement for  
575 multiple) and 157 samples that were likely colonized by multiple strains (80-100% agreement for  
576 multiple) (Table S1).

577 In addition to multiple strains of *S. 'fitti'* present in a single coral host, the coral can be  
578 colonized by additional symbiont genera. We used the same classification methods above to  
579 detect background genera using the signal intensity of 18 genera probes (Table S4), but each  
580 sample was pre-assigned to a genus or classified as not colonized based on their allele patterns.  
581 The prediction accuracy of the LDA (Figure 7), decision tree (Figure S7A) and random forest  
582 (Figure S7B) was 98.9%, 96.4% and 98.9%, respectively. The predictions for each model are  
583 presented in Table S1. The presence of *Breviolum* was detected in thirteen samples with one of  
584 the classification methods, ranging from 0.2% to 100% probability. Of these, seven had  
585 probabilities greater than 60% and two of those also had *S. 'fitti'* strain IDs indicating co-  
586 infection. The *Cladocopium* containing samples were split into two clusters, one contained  
587 samples that were exclusively *A. muricata* hosts (*Cladocopium* 2) and the other contained host  
588 samples that were *A. cervicornis* ( $n= 2$ ), *A. digitifera* ( $n= 8$ ), and *A. millepora* ( $n= 5$ ). Finally,  
589 there were 49 samples with *Durisdinium* ( $n= 5$  *A. muricata*, 3 *A. cervicornis*, 41 *A. palmata*).  
590 Samples containing *Cladocopium* or *Durisdinium* failed the *S. 'fitti'* genotyping analysis.

### 591 ***Suitability for Pacific acroporids***

592 Based on *in silico* genome searches, 26,963 of the coral probes matched *A. hyacinthus*,  
593 28,395 matched *A. millepora* and 14,399 matched *A. tenuis*. Given that our probes were designed  
594 using the genome assembly of *A. digitifera* and that they had high homology to other species, we  
595 tested whether we could find a conserved set of probes across the Pacific acroporids for future  
596 genotyping studies. The Pacific samples were run separately for each species in the genotyping

597 mode in the Axiom Analysis Suite to get the recommended probe set for each species. This  
598 analysis did not enforce a dish-quality threshold. A total of 15,717, 21,520 and 7,275 probes  
599 were recommended for *A. digitifera* ( $n= 9$  samples), *A. millepora* ( $n= 5$  samples) and *A. muricata*  
600 ( $n= 11$  samples), respectively. Only those probes that were recommended for all three species  
601 were used for further analysis ( $n= 1,779$  probes, Table S7). The pairwise genetic distance among  
602 *A. digitifera* samples ranged from 0.018 to 0.081 (Figure 8A), with tight clustering in all but one  
603 sample. Two *A. millepora* samples were nearly identical (Prevosti's distance = 0.00084) and  
604 differed only at two probes (Figure 8B), while the largest pairwise genetic distance was only  
605 0.024 (difference of 42 probes). Similarly, two *A. muricata* samples were also closely related,  
606 with a Prevosti's distance of 0.004 (Figure 8C). For this species a clear pattern emerged  
607 separating the nearshore and offshore samples with a maximum pairwise distance of 0.429 (763  
608 probes, Figure 8C). Although the sample size is too limited for each species to determine  
609 genotyping thresholds, less than 50 loci are necessary to identify the 33 unique genets in this  
610 dataset based on a genotype accumulation curve (Figure S8).

## 611 **Discussion**

612 Here we report the first genotyping array for corals, which in combination with an open  
613 access Galaxy Scientific Gateway to execute the Standard Tools for Acroporid Genotyping  
614 (STAG) workflow produces multi-locus genotypes for coral hosts and their algal symbionts. In  
615 the workflow, new user-supplied samples are compared to previously genotyped samples and  
616 their results contribute to the growing STAG database (Figure 1). This archive of coral genets  
617 and symbiont strains can be used to identify reefs with high host and/or symbiont genetic  
618 diversity, temporal and spatial changes, and shuffling in host-symbiont pairings. In addition, a

619 subset of the Caribbean genotyping probes can be used to genotype Pacific acroporids,  
620 expanding the utility of the STAG workflow to hundreds of species.

621         The SNP array and analysis workflow developed here delineate genets in agreement with  
622 the previous gold standard for Caribbean acroporid genotyping, multiplex microsatellite  
623 genotyping (Baums et al. 2005a). The STAG workflow uses 61% of the coral loci to produce the  
624 host genotype (Table 1) and identified 325 genets out of 479 genotyped samples (Table 3). The  
625 average genetic distance of 0.0064 (difference of 0.64%) among ramets was well below our  
626 maximum between genet genetic distance threshold of 0.032 (Figure 4C), which accounts for  
627 both biological processes (mutations) and technical error during genotyping. We estimate that  
628 technical error accounts for  $\leq 0.0053$  (0.53%) of this variation based on the lower genetic  
629 distance observed within plate for both species than the replicate analysis on the same DNA  
630 extraction from a single tissue sample (Figure 4B and Table S8). The differences observed in  
631 ramet genetic distance between plates may be due to the genotyping probe set applied to all  
632 plates irrespective of the recommended set for each plate (Table S5). Differences in genetic  
633 distances of ramets can also arise from DNA quality that is influenced by sample preservation,  
634 tissue type, extraction method, and extraction laboratory. We found a positive relationship  
635 between missing data and total heterozygosity (Figure S2), suggesting that a portion of  
636 heterozygous genotype calls in the lower quality samples might be an artifact of technical error.  
637 This was evident in the different percent heterozygous estimate of the fixed probes in the  
638 between laboratory replicate extractions (Table S10). However, our technical error is similar to  
639 previous genotype concordance estimates ranging from 0.2% to 2.4% for replicates of a given  
640 subject genotyped on Affymetrix SNP arrays for humans (Hong et al. 2012), rainbow trout (Palti  
641 et al. 2015), soybean (Lee et al. 2015) and walnut (Marrano et al. 2019). In that latter study, the

642 variation was also higher between technical replicates than biological replicates, which the  
643 authors attributed to DNA quality. All these sources of technical variation are accounted for in  
644 the genotype assignment by the STAG workflow, resulting in robust coral genet identification.

645         Technical variability can be minimized by standardizing procedures. We recommend that  
646 adult samples of at least 3- 4 polyps are preserved in 95% non-denatured ethanol (190 proof),  
647 stored as cold as possible and extracted using the Qiagen DNeasy tissue extraction kit. DNA  
648 requirements are modest for the Axiom SNP array. Adult tissue, single larva and concentrated  
649 sperm were successfully genotyped in samples with DNA concentrations as low as 63 pg/ $\mu$ l,  
650 although higher concentrations are recommended. While high-quality, non-degraded DNA  
651 provided the best results, moderately degraded samples (i.e. extractions that show a dense band of  
652 high molecular weight DNA with some smearing across size ranges) were also successfully  
653 genotyped. DNA requirements with respect to quality and quantity are thus comparable to  
654 RADseq and whole genome sequencing techniques.

655         *A. palmata* and *A. cervicornis* differ in the scale of dispersal with *A. cervicornis* showing  
656 higher levels of population subdivision across the Caribbean and North Atlantic compared to *A.*  
657 *palmata* (Baums et al. 2014; Baums et al. 2010; Hemond and Vollmer 2010; Vollmer and  
658 Palumbi 2007; Drury et al. 2016; Porto-Hannes et al. 2014). *A. palmata* stands were found to be  
659 structured into two long-separated East/West populations based on microsatellite data (Baums et  
660 al. 2005b), but additional samples from the Mesoamerican Reef Tract (Porto-Hannes et al. 2014)  
661 and the development of SNP markers (Devlin-Durante and Baums 2017) resulted in the  
662 discovery of further population structure. Our results from a limited number of geographic  
663 locations identified three populations in *A. palmata* consistent with the previous study by  
664 Devlin-Durante and Baums (2017), recovering the East/West divide with additional substructure

665 between Puerto Rico and Curacao in the East. We also recovered three populations in *A.*  
666 *cervicornis*, but with substructure detected between the Western Caribbean populations of  
667 Florida and Belize.

668 Quantifying the extent to which introgression has historically occurred and may occur  
669 now can elucidate the evolutionary and ecological significance of hybridization in acroporids.  
670 Using the species-specific fixed SNPs, we identified 39 F1 hybrid genets and corrected several  
671 species misidentifications in the field based on colony morphology (one classified hybrid  
672 identified as *A. palmata* in the field and two classified *A. palmata* identified as hybrid in the  
673 field). While F1 hybrids are more common, later generation backcrosses do occur (van Oppen et  
674 al. 2000; Vollmer and Palumbi 2002a) albeit the direction of introgression has been debated  
675 (Palumbi et al. 2012; Vollmer and Palumbi 2002b; 2003). Here, we identified one later  
676 generation hybrid that was classified as a putative backcross *A. palmata* (44.98% heterozygous  
677 and 52.7% *A. palmata*; Figure 6) in contrast to earlier findings that backcrosses are restricted to  
678 introgression of *A. palmata* genes into the *A. cervicornis* genome. A recent report also found  
679 putative *A. palmata* backcrosses based on microsatellite data in the Lesser Antilles (Japaud et al.  
680 2019). Together, these results support the conclusion of bidirectional introgression in Caribbean  
681 acroporids.

682 Because of the intimate association between corals and algae, the SNP array was  
683 designed to assay host and symbiont DNA simultaneously, a novel application for the Axiom  
684 SNP array. The array contains a much smaller number of symbiont-specific probes compared to  
685 host probes and thus information gleaned from these probes is more limited. The large genome  
686 size, haploidy and asexuality of *Symbiodinium fitti*, the dominant symbiont of the Caribbean  
687 acroporids (Pinzón et al. 2011), presents challenges. The lower allelic diversity of *S. fitti*

688 microsatellite loci compared to the allele diversity of their cnidarian host counterparts  
689 necessitates using larger number of loci for strain resolution (Baums et al. 2014). After  
690 exhaustive filtering of the symbiont genotyping probes based on their performance, only 20% of  
691 the loci remained which recovered reproducible strain identity in replicate ramets of a given  
692 genet. However, given the limited prior strain information for the samples, the conservative  
693 threshold we used for strain assignment will need to be validated with more known strains in the  
694 future. Only 58% of coral samples with symbionts yielded an *S. 'fitti'* genotype (Table 2).  
695 Failures were either due to inefficient symbiont DNA recovery in the extraction or to presence of  
696 other Symbiodiniaceae genera. Comparison of strain resolution achieved with the SNP array  
697 relative to microsatellite strain resolution revealed previously unresolved strain diversity. It is not  
698 yet clear how much of this strain diversity results from mutational processes versus diversity  
699 produced as a result of recombination between strains (Baums et al. 2014; Liu et al. 2018).

700 *Acropora* colonies are at times colonized by more than one strain of *S. 'fitti'* (Baums et al.  
701 2014) but classification of colonies as being colonized by a single or multiple strains was  
702 challenging (Fig S5). In contrast, the ability to detect the presence of other Symbiodiniaceae  
703 genera within coral samples is encouraging (Fig 7). We detected eight *A. cervicornis* and 44 *A.*  
704 *palmata* colonies that harbored symbionts of the genera *Breviolum*, *Cladocopium* or  
705 *Durusdinium*. Of these, three *A. cervicornis* and three *A. palmata* are likely to be co-colonized by  
706 *Breviolum* and *S. 'fitti'*, a combination of symbionts shown to be intermittent in *A. cervicornis*  
707 through profiling the *ITS2* gene (Thornhill et al. 2006). Further, symbiont genera detected in  
708 nearshore (= *Durusdinium*) and offshore (= *Cladocopium*) *A. muricata* samples were consistent  
709 with a recent study by Hoadley et al. (2019), although this taxon of *Cladocopium*  
710 (*Cladocopium\_2*) was distinctly different from the other *Cladocopium* taxon (*Cladocopium*)



711 containing both Caribbean and Pacific hosts (Fig. 6). The two *Cladocopium* groups differed in  
712 their signal intensities for the genera probes with samples in the Cladocopium\_2 having signal  
713 intensity on average 4.5x higher than samples within the Cladocopium taxon. Signal intensities  
714 may vary due to quantity of DNA, random difference in hybridization efficiency, and variable  
715 affinity of probes to different symbiont taxa within genera. Thus, we stress here that the SNP  
716 array cannot be used to derive quantitative differences among symbiont taxa associated with a  
717 coral sample. Moreover, DNA from cultured *S. tridacnidorium* was also on average 4x higher  
718 than mixed *Acropora-S. 'fitti'* samples, suggesting that “pure” symbiont DNA extracts cannot be  
719 directly compared to mixed host-symbiont samples. Further experiments should benchmark the  
720 method by testing mixtures of Symbiodiniaceae genera with known composition.

721         Application of the current array to non-target Pacific acroporid species is possible when  
722 the sole intent is to delineate genets as is often required in restoration settings. Because of the  
723 large ascertainment bias inherent in applying probes designed for Caribbean acroporids to long-  
724 separated Pacific species, population genetic models and models designed to detect loci under  
725 selection should not be applied to this data.

726         The combination of the tools presented here provides reliable, standardized identification  
727 of host genotypes in diverse *Acropora* spp. and symbiont strains of the Caribbean species. These  
728 markers and analysis tools can be used for basic research questions such as gene by environment  
729 interactions, hybridization history, or identification of loci under selection. Genetic linkage maps  
730 can be generated and inbreeding levels, and relatedness questions can be addressed. Because of  
731 the low error rate, the SNP array is particularly suited for the detection of somatic mutation,  
732 which are expected to be common in the large, old genets that are now dominating Caribbean

733 *Acropora* populations. Restoration practitioners can use the information to design propagule  
734 transfer zones and choose genets for nursery rearing.

735

## 736 **Acknowledgements**

737 Funding for this project was supported by NOAA Office for Coastal Management  
738 NA17NOS4820083 awarded to IBB and SAK, and NSF OCE-1537959 awarded to IBB, NDF  
739 and WM. We are grateful for assistance with sample collection by Zachary Fuller, Mikhail Matz,  
740 Stephen Palumbi, Todd LaJeunesse, Jose M. Eirin-Lopez, Coral Restoration Foundation, The  
741 Nature Conservancy, and Fragments of Hope, and sample preparation by Meghann Devlin-  
742 Durante and Sam Piorkowski. We thank Sam Vohsen and Eslam Osman for valuable feedback on  
743 the Multilocus Genotype tool and Reef Futures 2018 workshop participants for their feedback on  
744 the Galaxy CoralSNP analysis environment. Permits for samples include Florida: CRF permit  
745 numbers CRF-2017-009, CRF-2017-012, NOAA FKNMS permit numbers FKNMS-2011-159-  
746 A4, FKNMS-2001-009, FKNMS-2014-148-A2, and FKNMS-2010-130-A, Belize: CITES  
747 Permit 0385, 7487 and 7488; Curacao: CITES Permit 16US784243/9 and 12US784243/9; and  
748 USVI Department of planning and natural resources, Division of fish and wildlife DFW14017T.

## 749 **Data Availability**

750 The Galaxy CoralSNP analysis environment is available at and database reports are available at  
751 <https://coralsnp.science.psu.edu/reports>. The code for the new tools developed for this study are  
752 available at [https://github.com/gregvonkuster/galaxy\\_tools/tree/master/tools/corals](https://github.com/gregvonkuster/galaxy_tools/tree/master/tools/corals) and  
753 [https://github.com/gregvonkuster/galaxy\\_tools/tree/master/galaxy](https://github.com/gregvonkuster/galaxy_tools/tree/master/galaxy). Sequences for the genome  
754 samples are available on NCBI under SRA project SRP149363. The coral probe annotation is

755 provided in Supplemental File 1 and the symbiont probe annotation is provided in Supplemental  
756 File 2.

### 757 **Author Contributions**

758 SAK conceived the project, obtained funding, designed and validated the array, developed  
759 genotyping analysis tools and wrote the manuscript. GVK developed genotyping analysis tools,  
760 created the STAG database, built the custom Galaxy Science Gateway and wrote part of the  
761 manuscript. KVK organized and extracted samples and edited the manuscript. HGR identified  
762 the *S. 'fitti'* SNPs and edited the manuscript. WM identified the *S. tridacnidorium* SNPs and  
763 obtained funding. SG provided Puerto Rico samples for analysis. NDF supplied coral samples,  
764 conducted laboratory comparison methods, obtained funding and edited the manuscript. IBB  
765 conceived the project, obtained funding, contributed to the array and database design and wrote  
766 the manuscript.

767

768 **Tables**

769 **Table 1. Number of recommended probes for each taxon from five independent runs.**

| Plate Number      | Probe Classification | <i>Caribbean Acropora</i> |               |              |               | Symbiont     |            |           |              |
|-------------------|----------------------|---------------------------|---------------|--------------|---------------|--------------|------------|-----------|--------------|
|                   |                      | Fixed                     | Population    | Variable     | Total         | Fixed        | Population | Genera    | Total        |
| <b>All probes</b> |                      | <b>25,889</b>             | <b>17,803</b> | <b>9,887</b> | <b>53,579</b> | <b>3,663</b> | <b>304</b> | <b>54</b> | <b>4,021</b> |
| <b>Plate 1</b>    | <b>Recommended</b>   | <b>9,919</b>              | <b>6,455</b>  | <b>3,342</b> | <b>19,716</b> | <b>2,176</b> | <b>109</b> | <b>18</b> | <b>2,303</b> |
|                   | polyHigh             | 9,663                     | 5,855         | 2,515        | 18,033        | 2,093        | 68         | 0         | 2,161        |
|                   | MonoHigh             | 181                       | 173           | 524          | 878           | 83           | 41         | 14        | 138          |
|                   | noMinor              | 75                        | 427           | 303          | 805           | 0            | 0          | 0         | 0            |
| <b>Plate 2</b>    | <b>Recommended</b>   | <b>10,199</b>             | <b>6,701</b>  | <b>3,445</b> | <b>20,345</b> | <b>2,210</b> | <b>100</b> | <b>15</b> | <b>2,325</b> |
|                   | polyHigh             | 9,987                     | 6,381         | 2,759        | 19,127        | 1,792        | 68         | 1         | 1,861        |
|                   | MonoHigh             | 165                       | 164           | 572          | 901           | 418          | 32         | 12        | 462          |
|                   | noMinor              | 47                        | 156           | 114          | 317           | 0            | 0          | 2         | 2            |
| <b>Plate 3</b>    | <b>Recommended</b>   | <b>12,299</b>             | <b>7,823</b>  | <b>4,137</b> | <b>24,259</b> | <b>2,189</b> | <b>109</b> | <b>17</b> | <b>2,315</b> |
|                   | polyHigh             | 11,916                    | 6,918         | 3,249        | 22,083        | 261          | 54         | 0         | 315          |
|                   | MonoHigh             | 195                       | 189           | 681          | 1,065         | 1,928        | 55         | 14        | 1,997        |
|                   | noMinor              | 188                       | 716           | 207          | 1,111         | 0            | 0          | 3         | 3            |
| <b>Plate 4</b>    | <b>Recommended</b>   | <b>10,171</b>             | <b>7,178</b>  | <b>3,814</b> | <b>21,163</b> | <b>2,247</b> | <b>107</b> | <b>16</b> | <b>2,370</b> |
|                   | polyHigh             | 8,989                     | 5,783         | 2,827        | 17,599        | 223          | 48         | 0         | 271          |
|                   | MonoHigh             | 435                       | 593           | 774          | 1,802         | 2,024        | 59         | 16        | 2,099        |
|                   | noMinor              | 746                       | 802           | 213          | 1,761         | 0            | 0          | 0         | 0            |
| <b>Plate 5</b>    | <b>Recommended</b>   | <b>11,093</b>             | <b>7,620</b>  | <b>4,038</b> | <b>22,751</b> | <b>2,215</b> | <b>113</b> | <b>17</b> | <b>2,345</b> |
|                   | polyHigh             | 8,748                     | 5,662         | 2,498        | 16,908        | 621          | 37         | 1         | 659          |
|                   | MonoHigh             | 459                       | 580           | 821          | 1,860         | 1,594        | 76         | 16        | 1,686        |
|                   | noMinor              | 1,886                     | 1,378         | 719          | 3,983         | 0            | 0          | 0         | 0            |

770

771

772 **Table 2. Success rate after quality-filtering of Caribbean acroporid and symbiont samples.**

773 To the left of the slash are those samples that passed the default quality filtering of the Best

774 Practices Workflow (BPW) and to the right is the total number of processed samples.

775

|                                      | Plate 1 |          | Plate 2 |          | Plate 3 |          | Plate 4 |          | Plate 5 |          |
|--------------------------------------|---------|----------|---------|----------|---------|----------|---------|----------|---------|----------|
|                                      | Coral   | Symbiont | Coral   | Symbiont | Coral   | Symbiont | Coral   | Symbiont | Coral   | Symbiont |
| <b>All samples</b>                   | 90/95   | 81/90*   | 92/96   | 78/95*   | 93/95   | 29/84    | 72/96   | 23/72*   | 90/96   | 70/96*   |
| <i>Mixed extractions</i>             | 81/84   | 76/89*   | 91/95   | 78/95*   | 83/83   | 29/83    | 72/72   | 23/72*   | 90/96   | 70/96*   |
| <i>Symbiont-enriched extractions</i> | 3/5     | 5/5      | --      | --       | --      | --       | --      | --       | --      | --       |
| <i>Sperm</i>                         | 1/1     | --       | 1/1     | --       | --      | --       | --      | --       | --      | --       |
| <i>Larvae</i>                        | 5/5     | --       | --      | --       | 10/12   | --       | --      | --       | --      | --       |
| <i>Symbiont culture</i>              | --      | 0/1*     | --      | --       | --      | 0/1*     | --      | --       | --      | --       |
| <i>Indo-Pacific acroporid</i>        | 0/1*    | --       | --      | --       | --      | --       | 0/24*   | --       | --      | --       |

776 \* Failed on dish quality (signal observed from non-polymorphic loci) – indication of different  
 777 coral/symbiont species or background symbionts.

778

779

780 **Table 3. Summary of population genetic variation of Caribbean acroporids estimated with**  
 781 **19,694 genotyping probes.**

| Species               | Population  | N   | N <sub>G</sub> | H <sub>O</sub> | H <sub>S</sub> | F <sub>IS</sub> |
|-----------------------|-------------|-----|----------------|----------------|----------------|-----------------|
| <i>A. cervicornis</i> | Belize      | 27  | 18             | 0.117          | 0.122          | 0.033           |
|                       | Cuba        | 1   | 1              | NA             | NA             | NA              |
|                       | Curacao     | 9   | 7              | 0.126          | 0.128          | -0.002          |
|                       | Florida     | 54  | 46             | 0.110          | 0.113          | 0.038           |
|                       | Puerto Rico | 35  | 21             | 0.127          | 0.118          | -0.042          |
|                       | USVI        | 16  | 9              | 0.113          | 0.109          | -0.023          |
| <i>A. palmata</i>     | Belize      | 37  | 27             | 0.148          | 0.149          | 0.013           |
|                       | Curacao     | 73  | 57             | 0.132          | 0.124          | 0.013           |
|                       | Florida     | 58  | 26             | 0.151          | 0.154          | 0.021           |
|                       | Puerto Rico | 132 | 75             | 0.141          | 0.140          | 0.000           |
|                       | USVI        | 8   | 8              | 0.156          | 0.156          | -0.004          |
| <i>A. prolifera</i>   | Antigua     | 8   | 8              | 0.656          | 0.410          | -0.543          |
|                       | Bahamas     | 2   | 2              | 0.692          | 0.415          | -0.705          |
|                       | Belize      | 21  | 21             | 0.674          | 0.406          | -0.580          |
|                       | Cuba        | 2   | 2              | 0.679          | 0.415          | -0.673          |
|                       | Curacao     | 4   | 4              | 0.689          | 0.382          | -0.770          |
|                       | USVI        | 2   | 2              | 0.700          | 0.412          | -0.725          |

782 N= number of samples, N<sub>G</sub>= number of genets, H<sub>O</sub>= average observed heterozygosity, H<sub>S</sub>=  
 783 average expected proportion of heterozygote individuals in the subpopulations, and F<sub>IS</sub>= average  
 784 inbreeding coefficient.  
 785

786

787 **Figures**

① Data Collection

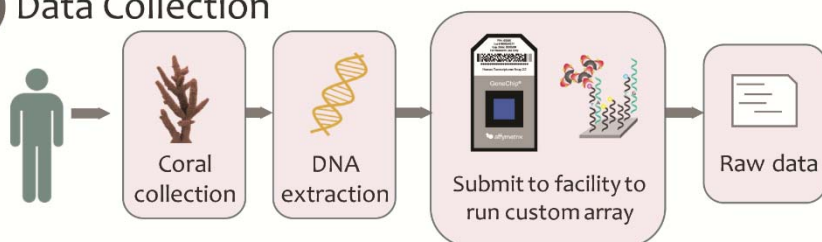

② Standardized and Automated Analysis

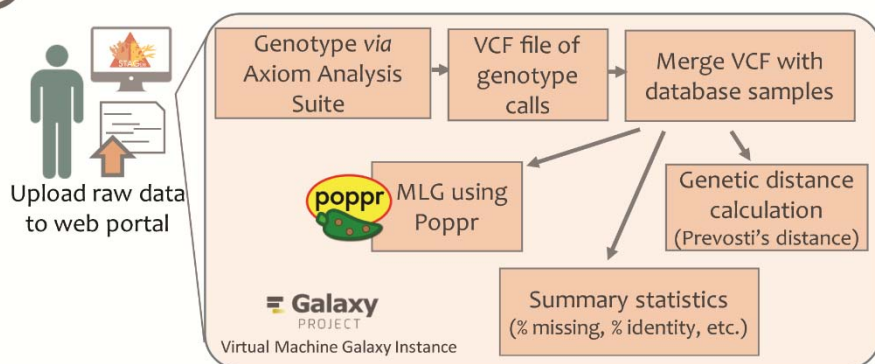

③ Deliverables to User

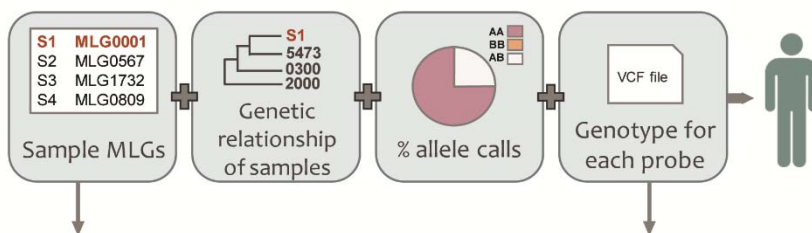

④ Archive Acroporid and Symbiont Genotypes

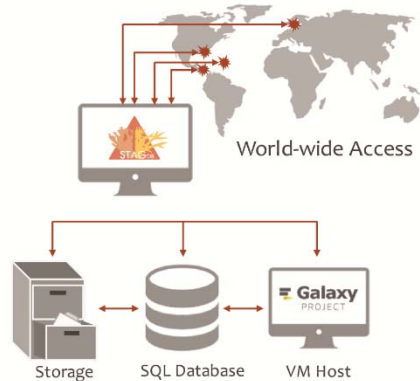

788

789

790 **Figure 1. General overview of Standard Tools for Acroporid Genotyping.** Step 1) user  
791 collects the coral, extracts the DNA and submits the DNA to their closest processing facility.  
792 Step 2) user uploads metadata and raw data to the Galaxy CoralSNP environment for analysis.  
793 Step 3) user downloads their multi-locus genotypes (MLG) among other deliverables. Step 4) the  
794 new sample MLGs and genotype information is deposited in the postgresSQL database that can  
795 be accessed from anywhere.  
796



797

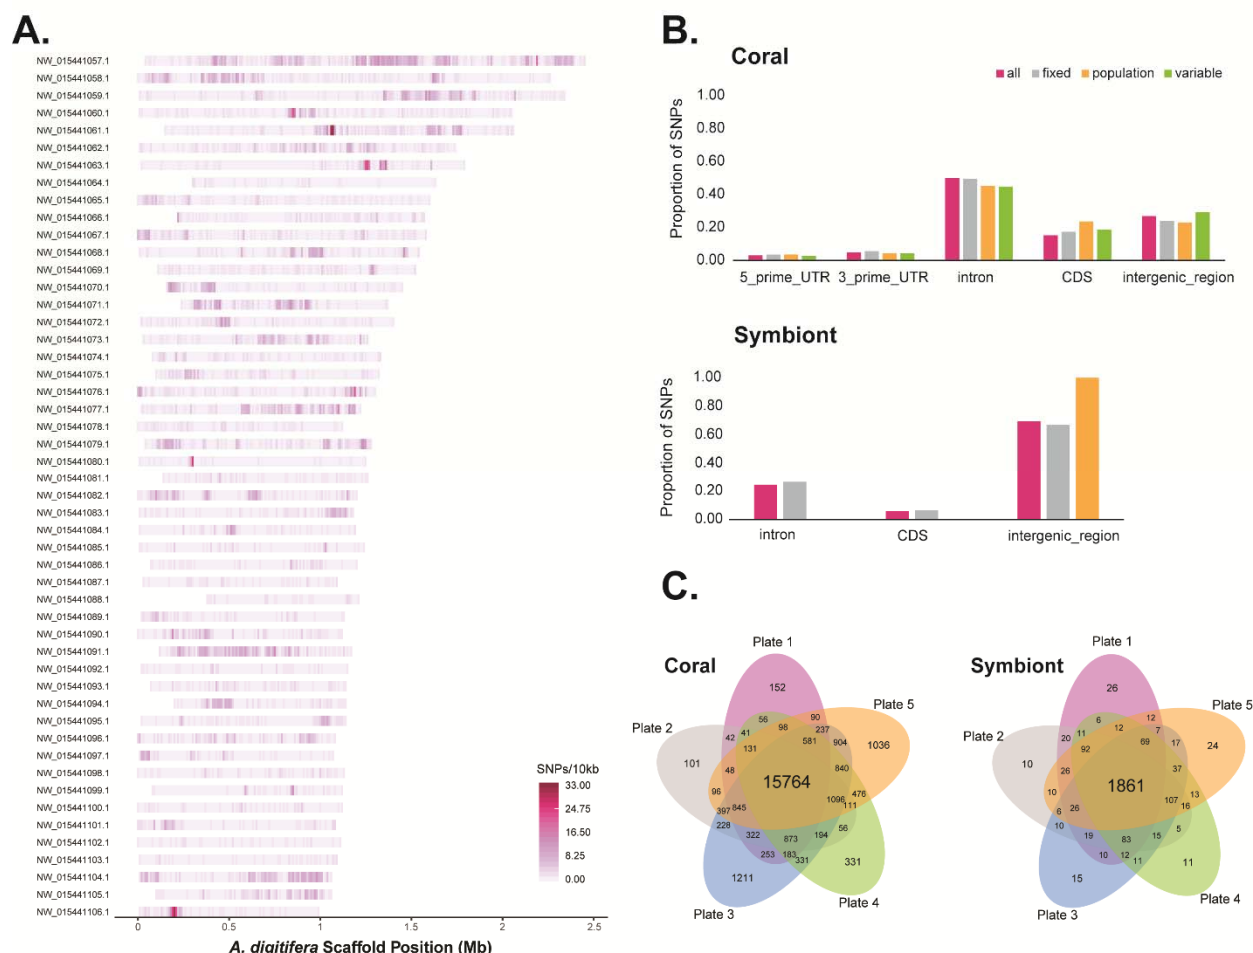

798

799

**Figure 2. Density, distribution and recovery of SNP probes.** The probe density over 10,000 bp

800

windows is mapped onto the 50 longest *A. digitifera* reference scaffolds (A). The highest density

801

exceeds 33 probes in a given interval, where most intervals are between 0 to 8 probes. The

802

proportion of designed probes are compared for coding and non-coding regions in the genomes

803

of the coral and symbionts (B). All probes are pink, fixed probes are grey, population probes are

804

orange, and variable probes are green. The recommended probes shared between each plate are

805

shown in the Venn diagrams (C).

806

807

A.

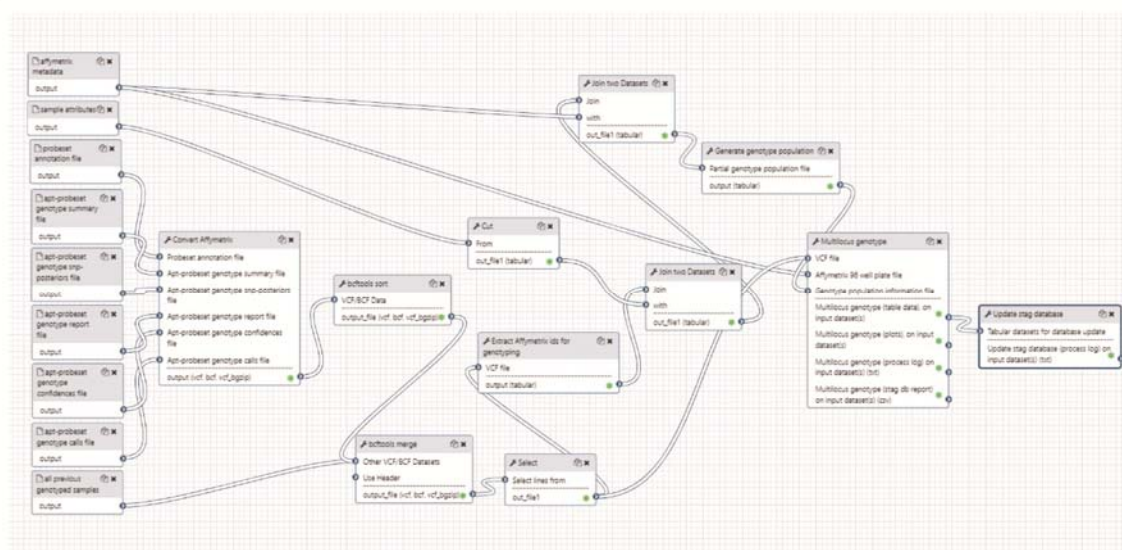

B.

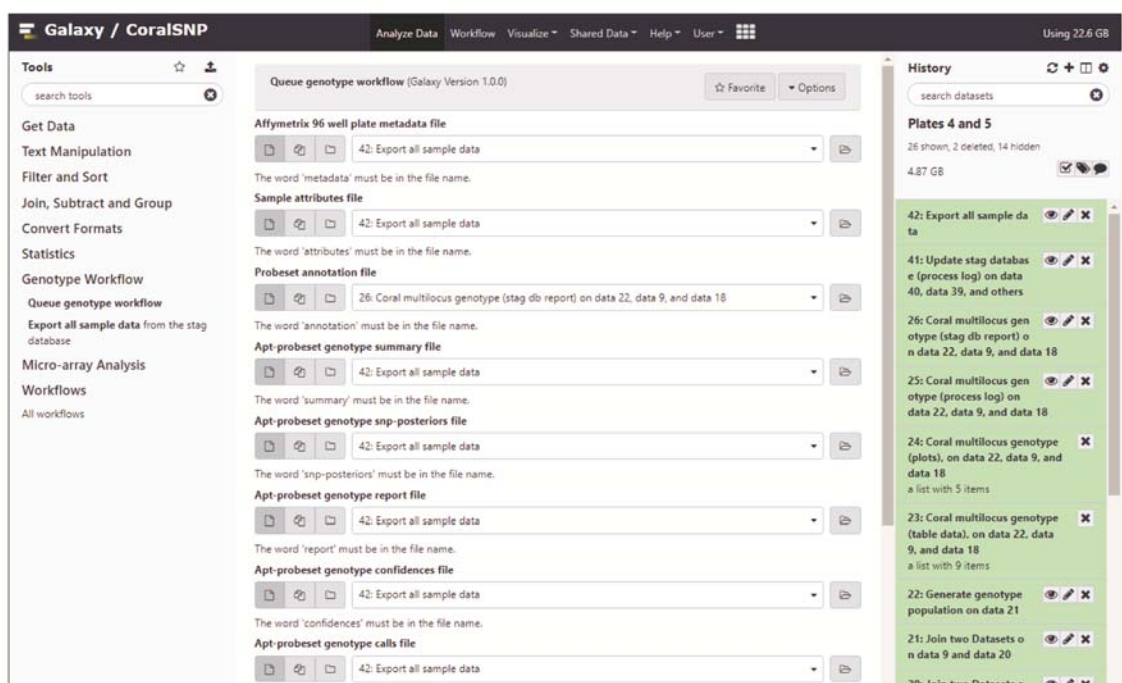

808

809 **Figure 3. Galaxy CoralsNP workflow and interface.** This analysis pipeline (A) is initiated by  
 810 the *Queue Genotype Workflow* tool via the Galaxy REST API. The workflow consists of the  
 811 following tools, all of which can be installed into a local Galaxy instance from the Main Galaxy  
 812 Tool Shed (<https://toolshed.g2.bx.psu.edu>). Affy2vcf2 converts Affymetrix genotype calls and

813 intensity files to the VCF format. Bcftools\_sort sorts bcf/vcf files. Bcftools\_merge merges  
814 bcf/vcf files. Affy\_ids\_for\_genotyping extracts information from a VCF files that contains  
815 Affymetrix identifiers and produces a file that contains a subset of the identifiers combined with  
816 additional data to generate the genotype population information for use as input to the *Coral*  
817 *Multilocus Genotype* tool. Genotype\_population\_info generates the genotype population  
818 information file for use as input to the *Coral Multilocus Genotype* tool.  
819 Coral\_multilocus\_genotype renders the unique combination of alleles for two or more loci for  
820 each individual. Update\_stag\_database updates the stag database tables from a dataset collection  
821 where each item in the collection is a tabular file that will be parsed to insert rows into a table  
822 defined by the name of the file. The code for these tools is available in GitHub at  
823 [https://github.com/gregvonkuster/galaxy\\_tools/tree/master/tools/corals](https://github.com/gregvonkuster/galaxy_tools/tree/master/tools/corals). The Galaxy CoralSNP  
824 *Queue Genotype Workflow* tool interface (B) consist of the analysis tools in the left tool panel.  
825 Selecting a tool displays the tool form in the center panel where the user can select the  
826 appropriate inputs for the tool and execute it. The tool outputs are added to the Galaxy analysis  
827 history on the right. The *Queue Genotype Workflow* tool accepts eight data files as inputs, the  
828 user metadata file and the Affymetrix sample attributes, annotation, summary, snp-posteriors,  
829 report, confidences and calls files. The tool includes a reference genome selection for the  
830 analysis. Once the tool is executed, the user can simply wait for the CoralSNP analysis pipeline  
831 to finish in the right panel.

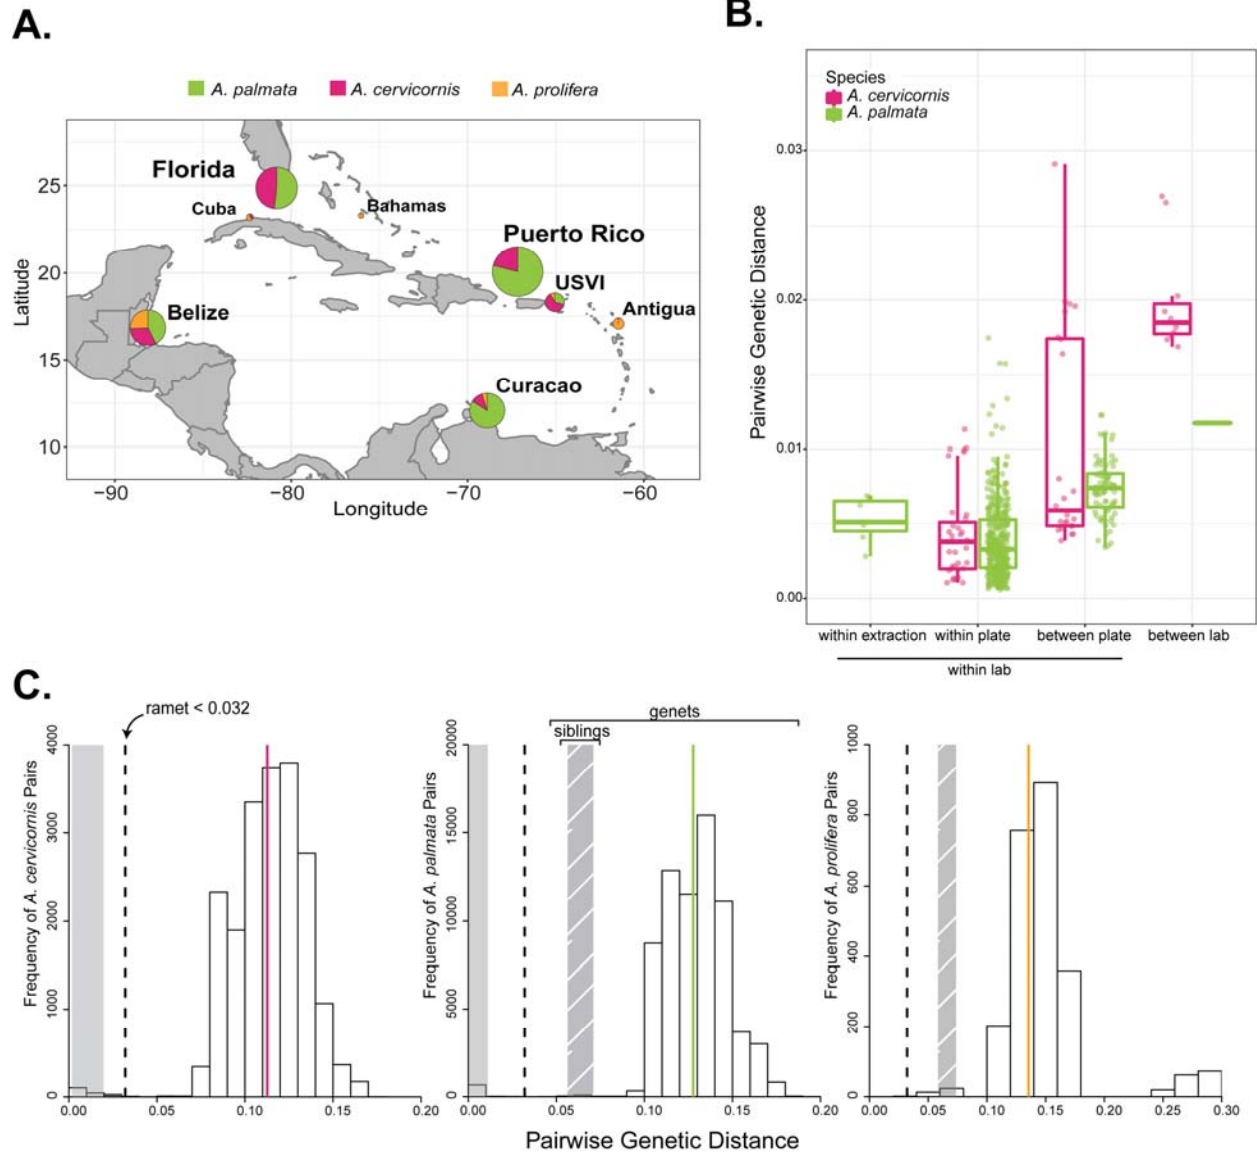

832

833

**Figure 4. Caribbean acroporid genotyping.** Pie-charts on the map of the Caribbean

834 represent the percentage of species at each collection locations for the 479 genotyped samples

835 (A). Prevosti's pairwise genetic distance of ramets, or clone mates, was compared between

836 technical replicates, samples within a plate and samples between plates processed within the

837 same laboratory to those processed in a different laboratory (B). A histogram of the frequency of

838 pairwise genetic distance values for each species indicates a break between ramets and genets

839 (C). The dashed line is the threshold for ramet identification and the solid line is the average

840 genetic distance for genets in the taxon (pink= *A. cervicornis*, green= *A. palmata*, orange= *A.*

841 *prolifera*). The solid grey and hatch-marked grey shaded areas represent the mean  $\pm$  standard  
842 deviation for ramets and siblings for each taxon, respectively.

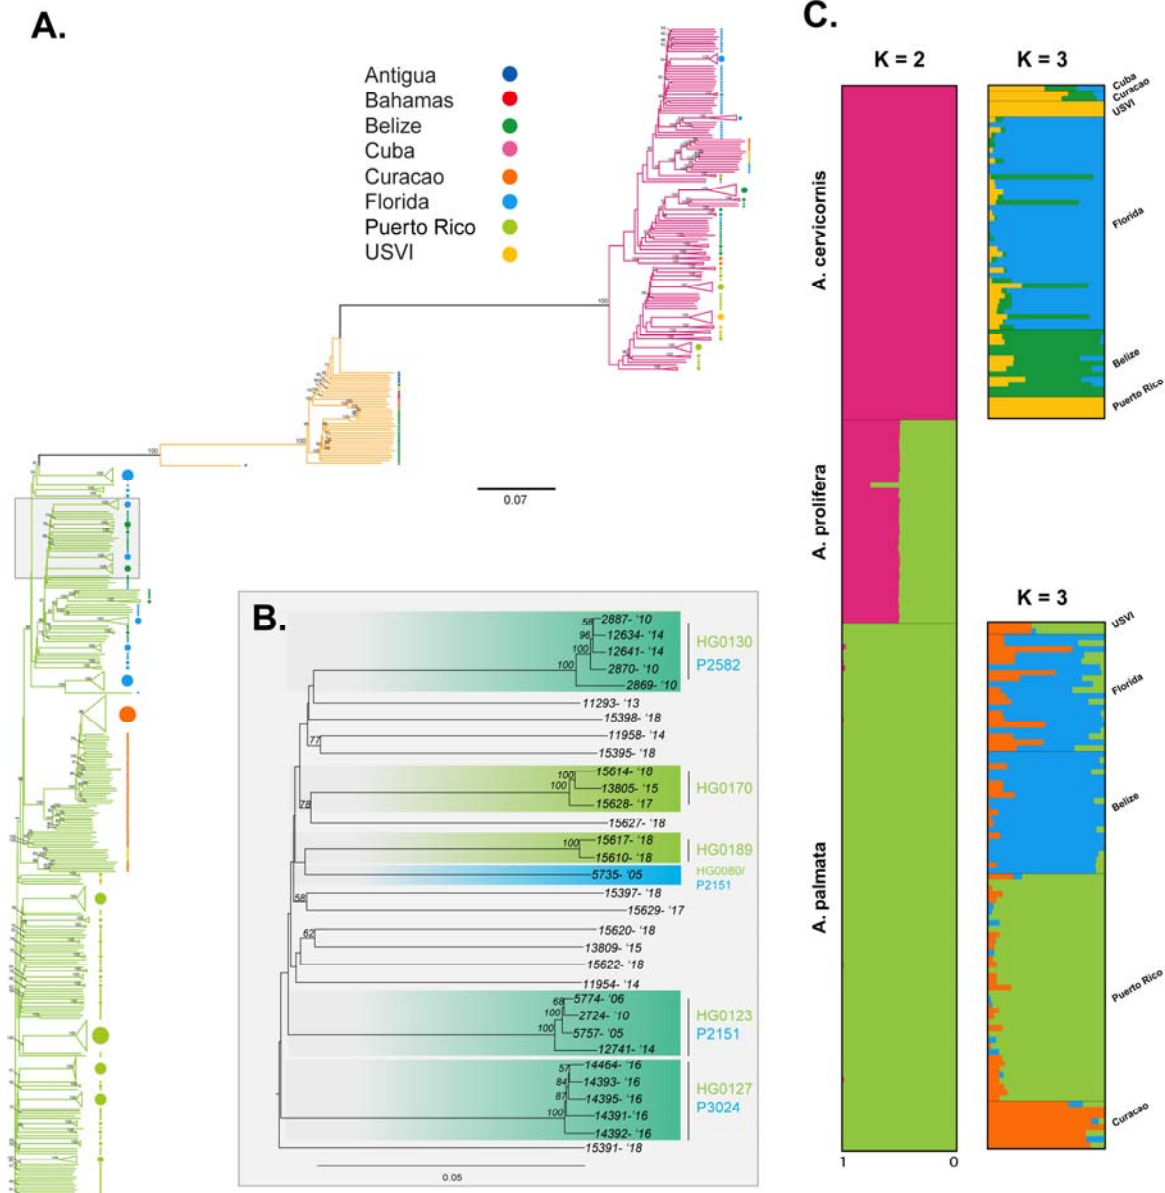

843

844 **Figure 5. Caribbean acroporid population analysis.** Prevosti's genetic distance of 19,694

845 SNPs was used to construct a neighbor-joining tree (A). The branches are colored by their

846 genetic species identification and collection locations are indicated by the color of the circle at

847 the terminal ends (Antigua = blue, Bahamas = red, Belize =green, Cuba = pink, Curacao =

848 orange, Florida = light blue, Puerto Rico = light green, and USVI= yellow). Nodal support is

849 based on the 100 bootstrap replicates. The nodes of genets with multiple ramets identified with

850 the SNP data are collapsed in the tree. In panel B, an example of genet resolution is provided

851 based on the array SNP data and the previous microsatellite IDs over different collection years.  
852 The SNP genet ID is presented in green on the top and the microsatellite genet ID is presented in  
853 blue on the bottom. The clades are shaded blue-green where the two genotyping methods are  
854 congruent. The collection year is presented next to the sample identification number.  
855 ADMIXTURE was run on a representative sample for each genet ( $n=193$ ), excluding genome  
856 samples, offspring of a Curacao cross and Puerto Rico samples from plate 9SR22844 (C).  
857 Individual bars represent the relative proportion of membership of a sample to the inferred K  
858 populations. Results from two source populations for all samples and three source populations  
859 for each species separately (K=3 had the lowest cross-validation error for both species, Figure  
860 S5).

861

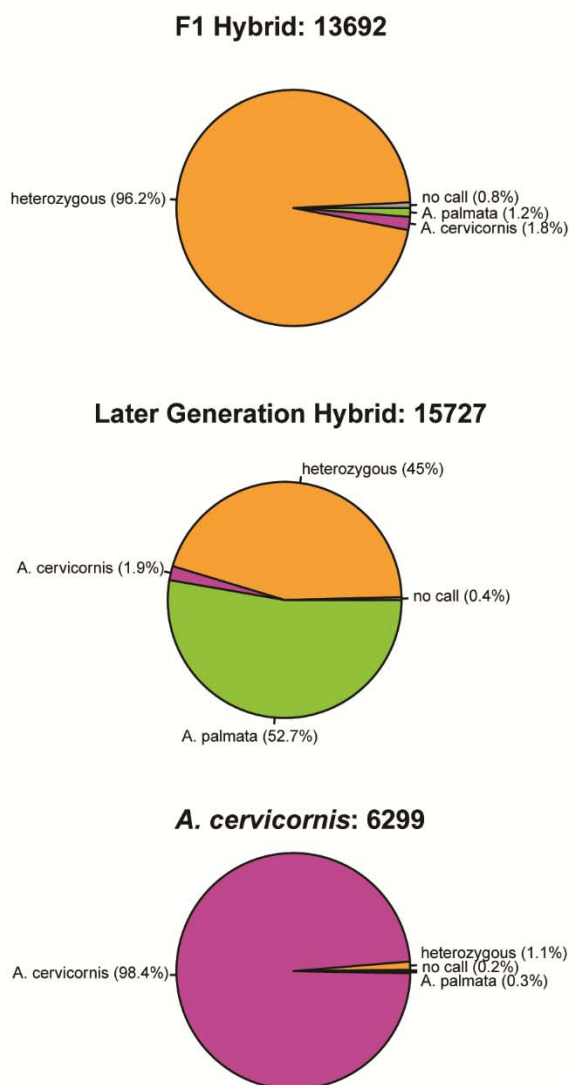

862

863 **Figure 6. Species-specific SNPs identify hybrids.** Sample 13692 was identified as an F1 and

864 sample 15727 as a later generation hybrid. For comparison, sample 6299 is identified as a pure

865 *A. cervicornis* sample. The 9,072 fixed SNPs were scored as homozygous for each species, *A.*

866 *palmata* or *A. cervicornis*, or as heterozygous.



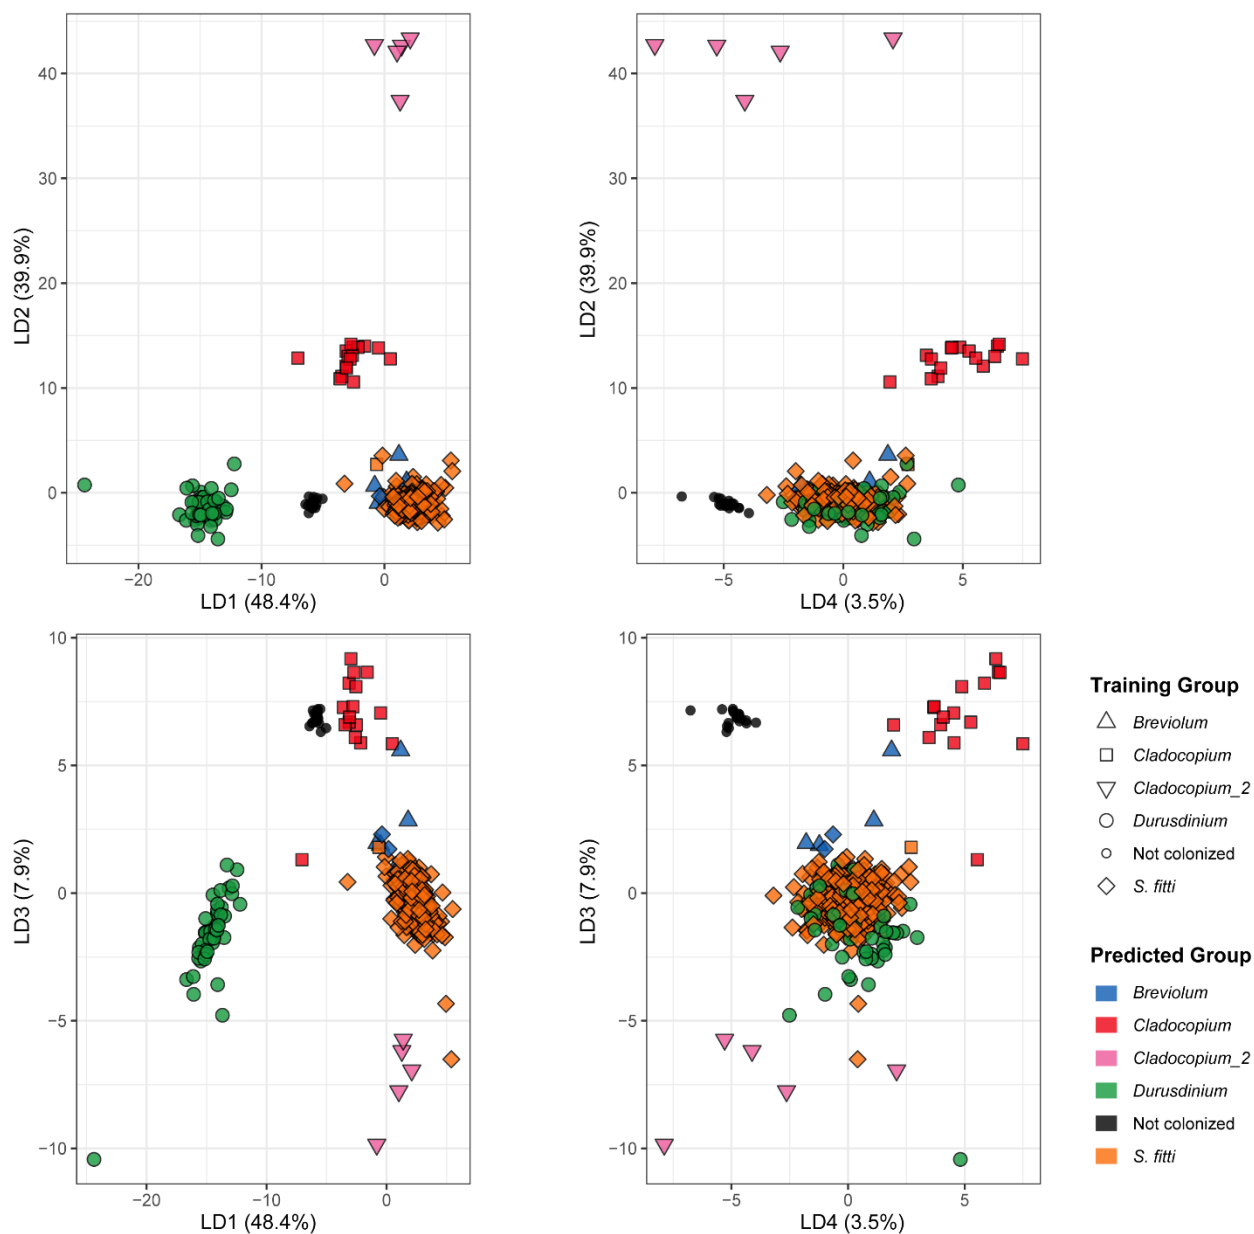

867

868 **Figure 7. Detection of background symbiont genera.** Results of the linear discriminant

869 analysis where the shape denotes the preliminary training group genera assignment and the color

870 is the predicted genera assignment. LD1 separates *Durusdinium* and not colonized samples, LD2

871 separates *Cladocopium* taxa and LD3 starts to separate *Breviolum* from the *Symbiodinium* group.

**A. *A. digitifera***

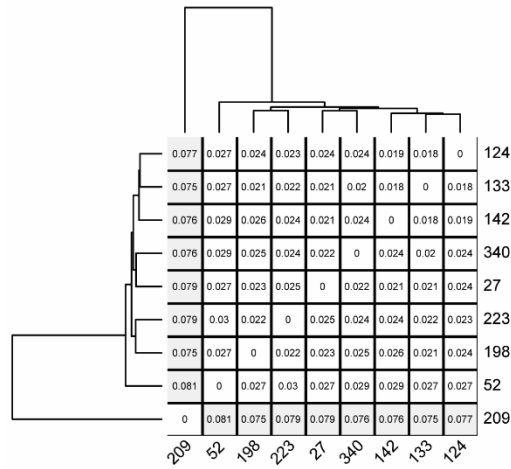

**B. *A. millepora***

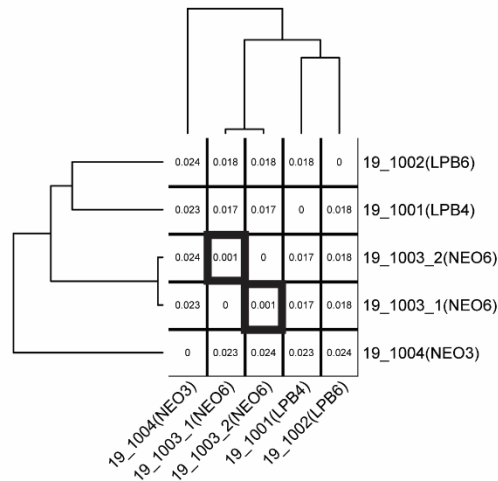

**C. *A. muricata***

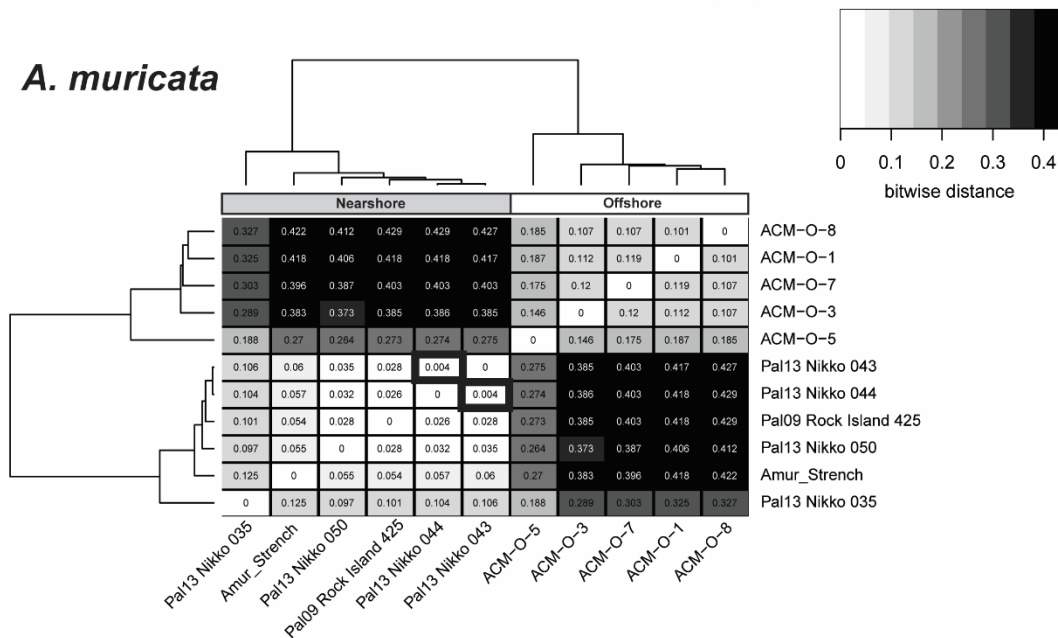

872

873 **Figure 8. Genetic distance of Pacific acroporids using 1,779 shared probes.** The relatedness  
 874 of samples from three Pacific species, *A. digitifera* (A), *A. millepora* (B) and *A. muricata* (C)  
 875 were compared using Prevosti's genetic distance. The distance for each pairwise sample  
 876 combination is displayed in the respective square of the heatmap. The darker the shading, the  
 877 larger the genetic distance between samples. The dendrogram on the top and side represents the  
 878 hierarchical clustering of the samples based on genetic relatedness. Samples with thick black

879 borders are nearly identical for the probes tested and are likely the same genet. In the case of *A.*  
880 *muricata* (C), clear separation is observed of nearshore and offshore samples.

881 **Supplemental Material**

882 **Table S1. Sample information for the five plates. (EXCEL)**

883

884 **Table S2. Number of population probes by species and location.**

| <b>Pairwise Comparison</b> | <b><i>A. palmata</i><br/>population<br/>probes</b> | <b><i>A. cervicornis</i><br/>population probes</b> |
|----------------------------|----------------------------------------------------|----------------------------------------------------|
| <b>VI to CU</b>            | 1,026                                              | 617                                                |
| <b>VI to BE</b>            | 1,727                                              | 1,531                                              |
| <b>VI to FL</b>            | 751                                                | 656                                                |
| <b>CU to FL</b>            | 532                                                | 607                                                |
| <b>CU to BE</b>            | 1,530                                              | 1,338                                              |
| <b>FL to BE</b>            | 253                                                | 586                                                |

885

886 **Table S3. Sequence accession ID for genera probe design.**

| <b>Gene</b>  | <b>Accessions</b>                                                                                                                            | <b>References</b>                                                              |
|--------------|----------------------------------------------------------------------------------------------------------------------------------------------|--------------------------------------------------------------------------------|
| <b>cob</b>   | JN557965.1, JN557953.1,<br>JN557943.1, JN557956.1,<br>JN557957.1                                                                             | (Pochon et al. 2012)                                                           |
| <b>COI</b>   | JN557913.1, JN557901.1,<br>JN557891.1, JN557904.1,<br>JN557905.1                                                                             | (Pochon et al. 2012)                                                           |
| <b>cp23S</b> | JN558021.1, JN557991.1,<br>JN557969.1, JN558007.1,<br>JN558010.1                                                                             | (Pochon et al. 2012)                                                           |
| <b>elf2</b>  | JN557889.1, JN557879.1,<br>JN557869.1, JN557882.1,<br>JN557883.1                                                                             | (Pochon et al. 2012)                                                           |
| <b>nr28S</b> | JN558091.1, JN558057.1,<br>JN558040.1, JN558075.1                                                                                            | (Pochon et al. 2012)                                                           |
| <b>ITS2</b>  | AF333507.1, AF333511.1,<br>AF499787.1, AF180124.1,<br>DQ480600.1, AF499793.1,<br>AF499797.1, AF334660.1,<br>Arif <i>et al.</i> ITS2 database | (LaJeunesse 2001; Reimer et al.<br>2006; LaJeunesse 2002; Arif et<br>al. 2014) |
| <b>psbA</b>  | JN557866.1, JN557854.1,<br>JN557844.1, JN557857.1,<br>AB086863-AB086880.1                                                                    | (Pochon et al. 2012; Takishita et<br>al. 2003)                                 |

887

888

889 **Table S4. Symbiont genera probes.**

| Affy SNP ID    | Probe Set ID                                   | Gene ID | Probe                                                                                               | Allele for each Genus* |
|----------------|------------------------------------------------|---------|-----------------------------------------------------------------------------------------------------|------------------------|
| Affx-501395681 | AX-197986815                                   | ITS2_1  | GATGGCCTCTTGAACGTGCATTGCGC<br>TCTTGGGAT [ <b>A/-</b> ]<br>] TGCCTGAGAGCATGTCTGCTTCAGT<br>GCTTCTACTT | [S/BCD]                |
| Affx-501395682 | AX-197986817                                   | nr28S_1 | TAAGCATATAAGTAAGCGGAGGAAAA<br>GGAACATAAA [ <b>C/T</b> ] AGGATTCCTTA<br>GTAATGGCGAACGAACAGGGATC      | [SD/BC]                |
| Affx-501395683 | AX-197986819                                   | nr28S_2 | CAGCAACCGACCAATCAATTGGGAGA<br>AGTTTGAGT [ <b>A/T</b> ] AGAGCATGTGTG<br>TTAGGACCCGAAAGATGGTGAAC      | [SD/BC]                |
| Affx-501395694 | AX-285063924,<br>AX-285063915,<br>AX-285063919 | elf2_1  | TACCTGATTGAGATCAAGGAGCATGT<br>GAACAGCGC [ <b>G/T/C</b> ] TTCCAGTGGG<br>CCACCAAGGAAGGACCTCTGTGCGA    | [S/B/CD]               |
| Affx-501395684 | AX-197986821                                   | cp23S_1 | ATAACGGTCCCTAAGGTAGCAAATTTTC<br>CTTGTGCGTC [ <b>C/T</b> ] TAATAACGACCT<br>GCATGAAACATAGAACGATTCGA   | [SCD/B]                |
| Affx-501395685 | AX-197986822                                   | cp23S_2 | AAGTGCAAAGATACATGTTTCGCTTA<br>ATGGCCCAA [ <b>T/-</b> ]<br>] GAAGTCCTTCCCAGTATTTAAATGC<br>TATCTTAATG | [D/SCB]                |
| Affx-501395698 | failed                                         | psbA_1  | CTTTATGGCAACAACATTATAACAGG<br>AGCTGTAAT [ <b>T/C/A</b> ] CCGAGTTCTA<br>ATGCTATTGGTGTTTCATTTCTATCC   | [SD/B/C]               |
| Affx-501395686 | AX-197986824                                   | psbA_2  | TGCTTATATAATGGTGGAACATATCA<br>ATTTGTAGT [ <b>C/A</b> ] CTTCACATTCATG<br>CTTGGTGTGGCTTGCTGGATGGG     | [SB/CD]                |
| Affx-501395702 | AX-285063925,<br>AX-285063929                  | psbA_3  | TTTGGTCAAGAAGATGAACTTATAG<br>CATATCAGC [ <b>T/C/A</b> ] GCTCATGGTT<br>ATTTTGGTAGACTCATATTTCAATA     | [S/B/CD]               |
| Affx-501395706 | AX-285063939,<br>AX-285063930                  | COI_1   | CCTAGAGTCAATAATTTTTCTATCTT<br>AATTCTTTT [ <b>A/C/G</b> ] CTTTCATATC<br>TTTTCCCTAATCCTTTCTATAATCTC   | [S/B/CD]               |
| Affx-501365411 | AX-198034302,<br>AX-197937519                  | COI_2   | TTTATGCTTTTATTAACATTACCAAT<br>CTTATCTGG [ <b>T/A</b> ] AACTTCTTTTA<br>ATATTGGGTGATCTTCATTCTAA       | [SBC/D]                |
| Affx-501395690 | AX-285063938,<br>AX-285063914,<br>AX-285063940 | cob_1   | TTAAGGAATTCCTACTAATAATAAAAT<br>AGCATTTTT [ <b>T/G/C</b> ] CCTTTCATTA<br>TTAGTAAAGATTTCTATGGAAAGAT   | [S/B/CD]               |

890 \* S= *Symbiodinium*, B= *Breviolum*, C= *Cladocopium*, D= *Durusdinium*

891 **Table S5. Caribbean *Acropora* recommended genotyping probe sets from five plates.**  
 892 **(EXCEL)**

893  
 894 **Table S6. Symbiont recommended genotyping probe sets from five plates. (EXCEL)**  
 895

896 **Table S7. Pacific *Acropora* recommended genotyping probe set conserved across *A.***  
 897 ***digitifera*, *A. millepora* and *A. muricata*. (EXCEL)**  
 898

899 **Table S8. Genetic distance between replicate DNA extractions and ramets of Sand Island**  
 900 **samples.** Distances of DNA extractions originating from the same tissue sample are colored the  
 901 same whereas distances between ramets are not colored.  
 902

| Sample ID | SI-1.1 | SI-1.2 | SI-1.3 | SI-10.1 | SI-10.2 | SI-10.3 | SI-12.1 | SI-12.2 | 11956 |
|-----------|--------|--------|--------|---------|---------|---------|---------|---------|-------|
| SI-1.1    | 0      |        |        |         |         |         |         |         |       |
| SI-1.2    | 0.0041 | 0      |        |         |         |         |         |         |       |
| SI-1.3    | 0.0051 | 0.0049 | 0      |         |         |         |         |         |       |
| SI-10.1   | 0.0034 | 0.0047 | 0.0059 | 0       |         |         |         |         |       |
| SI-10.2   | 0.0071 | 0.0068 | 0.0061 | 0.0068  | 0       |         |         |         |       |
| SI-10.3   | 0.0020 | 0.0043 | 0.0050 | 0.0028  | 0.0063  | 0       |         |         |       |
| SI-12.1   | 0.0054 | 0.0054 | 0.0046 | 0.0049  | 0.0048  | 0.0042  | 0       |         |       |
| SI-12.2   | 0.0082 | 0.0067 | 0.0085 | 0.0076  | 0.0077  | 0.0078  | 0.0069  | 0       |       |
| 11956     | 0.0065 | 0.0093 | 0.0092 | 0.0071  | 0.0109  | 0.0060  | 0.0090  | 0.0123  | 0     |

903

904 **Table S9. Genetic distance for each genotype with multiple ramets. (EXCEL)**

905 **Table S10. Reproducibility of genet identification between laboratories.**

| User ID  | Msat<br>geneti<br>ID | preserva<br>tive | Extraction<br>method | Lab     | DNA<br>concentrati<br>on | SNP<br>genet ID | Missin<br>g Data | Heterozygosit<br>y | A.<br>cervicornis | A.<br>palmata | Genetic<br>Distanc<br>e |
|----------|----------------------|------------------|----------------------|---------|--------------------------|-----------------|------------------|--------------------|-------------------|---------------|-------------------------|
| 13935    | C1522                | Ethanol          | Qiagen<br>DNeasy     | Baums   | 34.71                    | HG0136          | 1.44             | 1.06               | 97.66             | 0.22          | 0.020                   |
| 13935_NF | C1522                | Ethanol          | CHAOS                | Fogarty | 0.064                    | HG0136          | 1.96             | 6.01               | 91                | 0.21          |                         |
| 3845     | C1548                | Ethanol          | Qiagen<br>DNeasy     | Baums   | 22.76                    | HG0003          | 0.36             | 0.57               | 98.81             | 0.3           | 0.018                   |
| 3845_NF  | C1548                | Ethanol          | CHAOS                | Fogarty | 1.894                    | HG0003          | 1.49             | 5.71               | 91.96             | 0.22          |                         |
| 13716    | C1639                | Ethanol          | Qiagen<br>DNeasy     | Baums   | 16.97                    | HG0006          | 1.23             | 2.04               | 96.51             | 0.29          | 0.027                   |
| 126_NF   | C1639                | CHAOS            | CHAOS                | Fogarty | 4.669                    | HG0006          | 2.28             | 7.45               | 88.75             | 0.22          |                         |
| 13829    | C1643                | Ethanol          | Qiagen<br>DNeasy     | Baums   | 9.27                     | HG0029          | 0.63             | 1.54               | 97.51             | 0.29          | 0.019                   |
| 13829_NF | C1643                | Ethanol          | CHAOS                | Fogarty | 8.975                    | HG0029          | 1.41             | 5.99               | 91.77             | 0.29          |                         |
| 13839    | C1645                | Ethanol          | Qiagen<br>DNeasy     | Baums   | 19.21                    | HG0059          | 0.2              | 0.79               | 98.32             | 0.75          | 0.017                   |
| 13839_NF | C1645                | Ethanol          | CHAOS                | Fogarty | 1.762                    | HG0059          | 1.37             | 5.8                | 91.59             | 0.71          |                         |
| 13923    | C1652                | Ethanol          | Qiagen<br>DNeasy     | Baums   | 3.41                     | HG0153          | 1.36             | 0.53               | 98.57             | 0.29          | 0.027                   |
| 13923_NF | C1652                | Ethanol          | CHAOS                | Fogarty | 6.951                    | HG0153          | 2.55             | 7.69               | 89.01             | 0.33          |                         |
| 13756    | C1343                | Ethanol          | Qiagen<br>DNeasy     | Baums   | 2.504                    | HG0144          | 0.96             | 0.73               | 98.43             | 0.3           | 0.019                   |
| 166_NF   | C1343                | CHAOS            | CHAOS                | Fogarty | 4.951                    | HG0144          | 1.78             | 6.28               | 90.89             | 0.29          |                         |
| 1151     | P1020                | Ethanol          | Qiagen<br>DNeasy     | Baums   | 22.16                    | HG0171          | 1.08             | 1.3                | 0.3               | 97.59         | 0.012                   |
| 1151_NF  | P1020                | Ethanol          | CHAOS                | Fogarty | 8.154                    | HG0171          | 1.42             | 3.32               | 0.3               | 94.64         |                         |

906



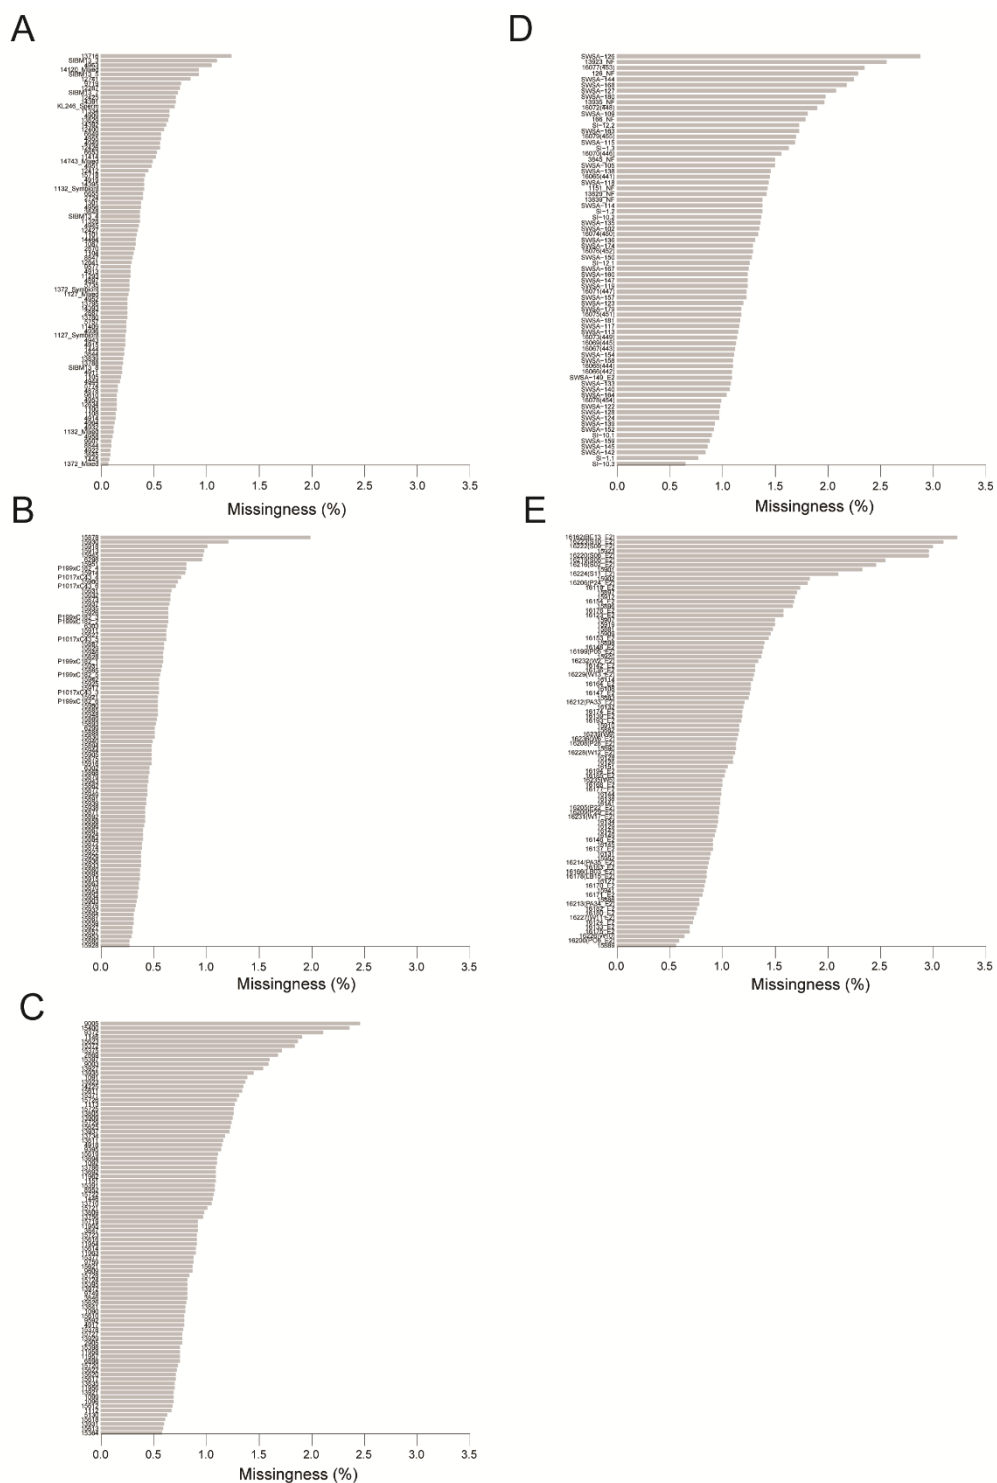

907  
908 **Figure S1. Percentage of missing genotype calls per sample split by each plate. Plates**

909 P9SR10073 (A), P9SR10074 (B), P9SR10076 (C), 9SR22843 (D) and 9SR22844 (E).

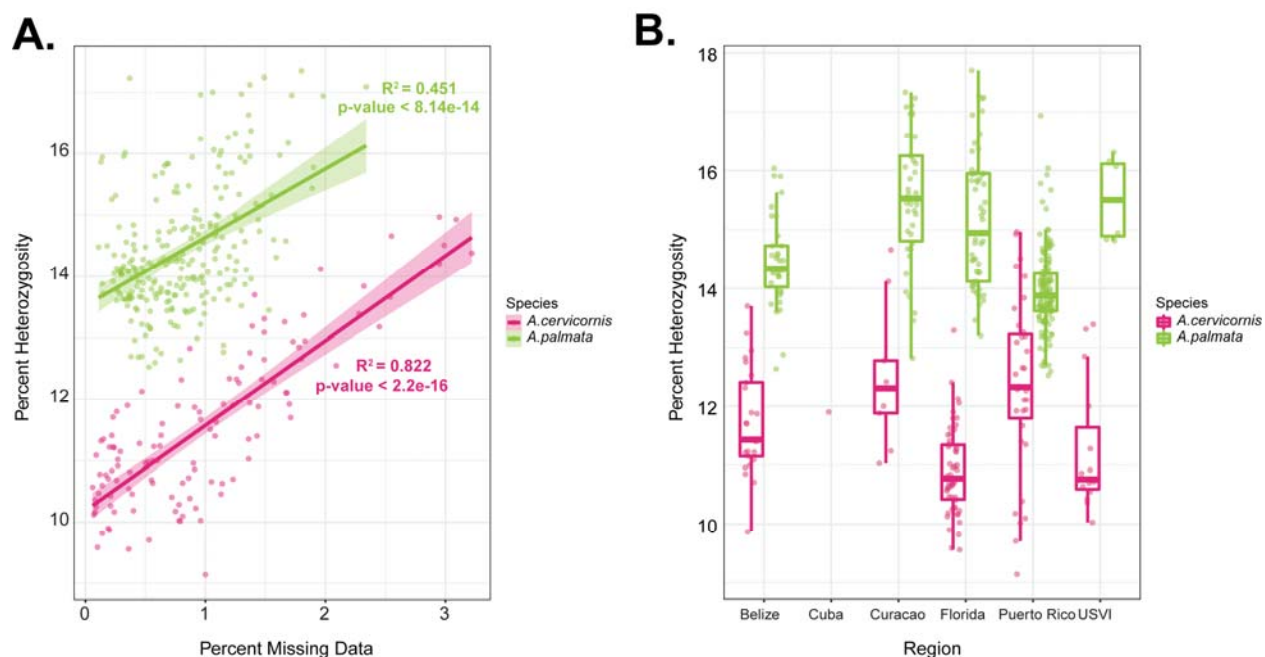

910  
911 **Figure S2. Percentage of heterozygosity by species and geographic region.** A positive  
912 correlation was detected between percentage of missing data and heterozygosity for each species  
913 (A). A breakdown by collection location and species reveals higher total percent heterozygosity  
914 in *A. palmata* compared to *A. cervicornis* (B).

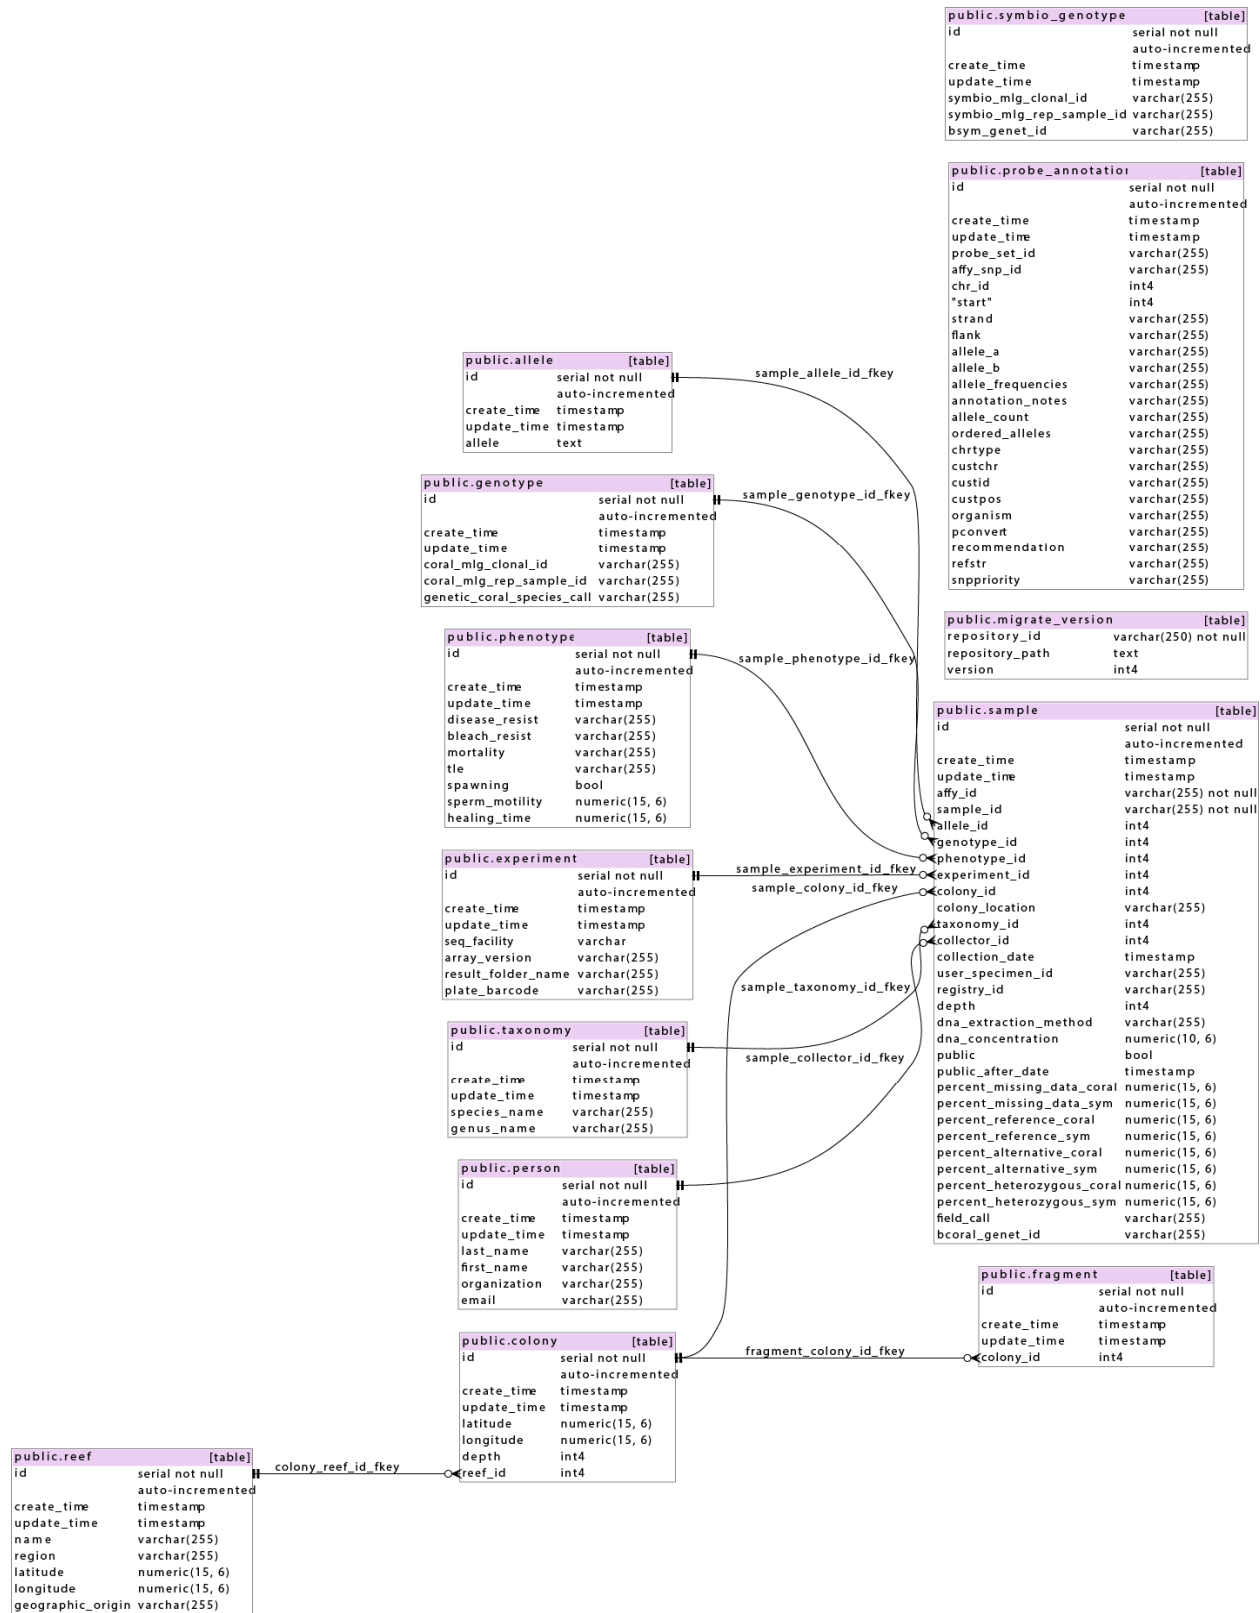

915  
916

**Figure S3. STAG database schema.** This database was initially populated with the genotypes

917

of 42 acroporid genomes that were sequenced in 2017. The database contains the genotype

918 pattern for each unique clonal ID and a list of all samples matching that clonal ID. It also  
919 contains metadata provided by the user about each sample such as collection site (GPS),  
920 collection date, sample depth, contact information of the collector, and sequencing facility of the  
921 raw data. The Python code that creates the stag database is available on GitHub at  
922 [https://github.com/gregvonkuster/galaxy\\_tools/blob/master/galaxy/corals\\_database/lib/galaxy/m](https://github.com/gregvonkuster/galaxy_tools/blob/master/galaxy/corals_database/lib/galaxy/m)  
923 [odel/corals/mapping.py](https://github.com/gregvonkuster/galaxy_tools/blob/master/galaxy/corals_database/lib/galaxy/m/odel/corals/mapping.py).

924

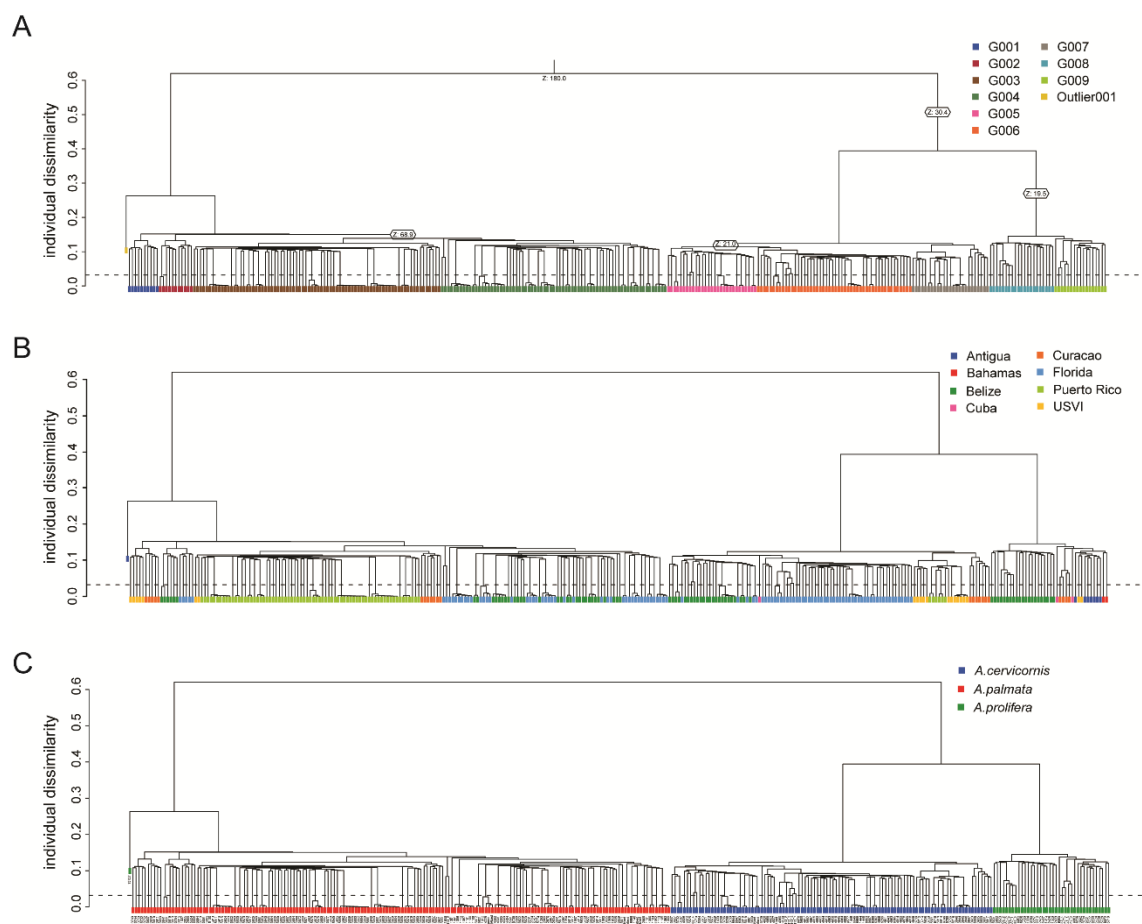

925

926

**Figure S4. Identity-by-state clustering for three plates based on z-score (A), region (B) or**

927

**species (C).**

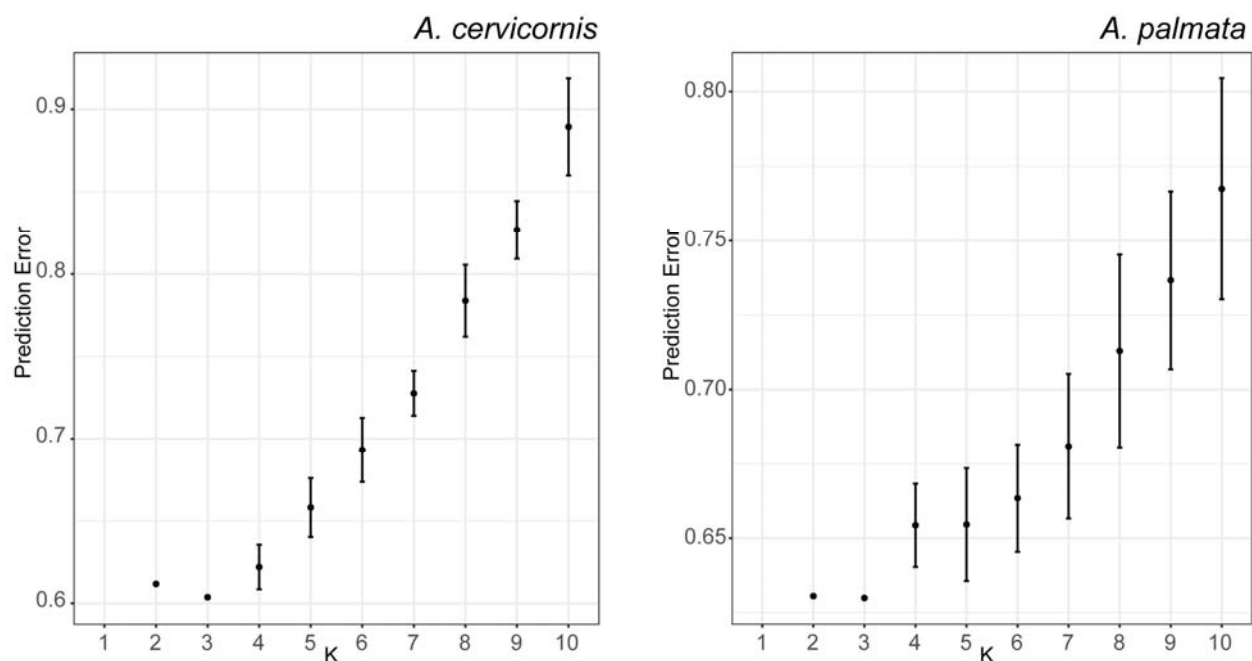

928

929 **Figure S5. Cross-validation error of tested K populations.** Each value of K was repeated 20  
930 times with a different random seed in ADMIXTURE. The mean value of CV prediction error +/-  
931 the standard deviation is shown. K=3 and K=3 had the lowest CV errors for both species (0.604  
932  $\pm 0.0009$  and  $0.630 \pm 0.0002$ ) for *A. cervicornis* and *A. palmata*, respectively.

933

A.

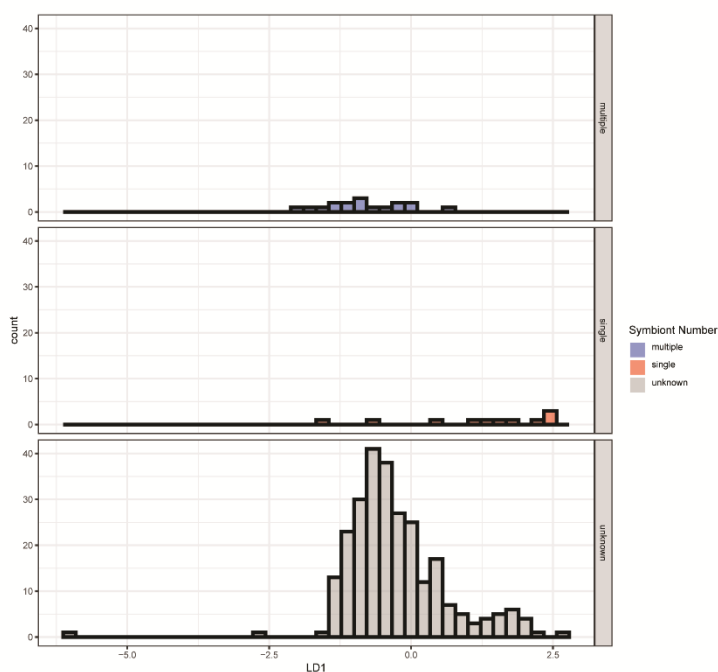

B.

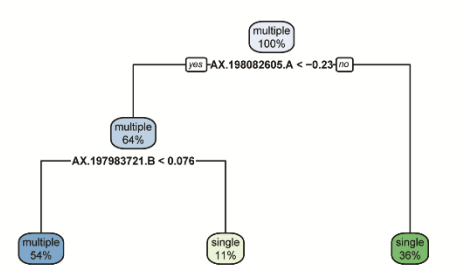

C.

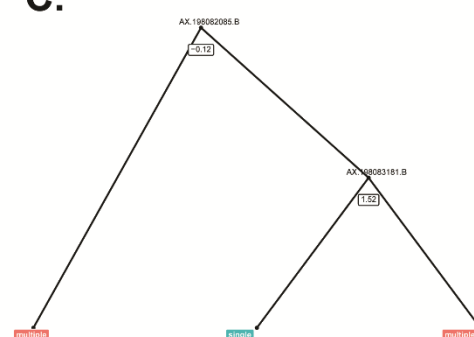

934

935 **Figure S6. Single or multiple symbiont colonization. Linear discriminant analysis (A)**

936

**decision tree (B) and random forest example tree (C).**

**A.**

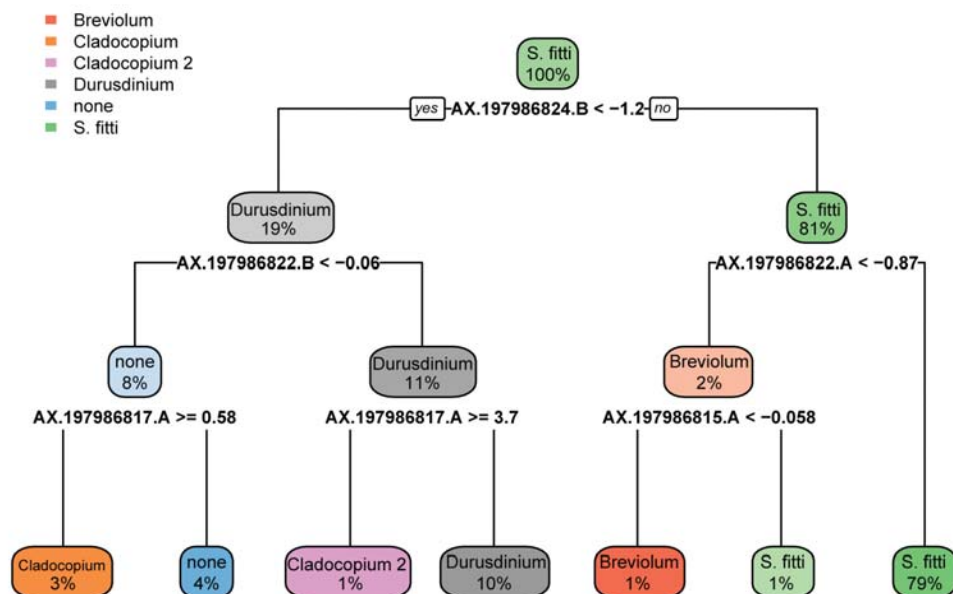

**B.**

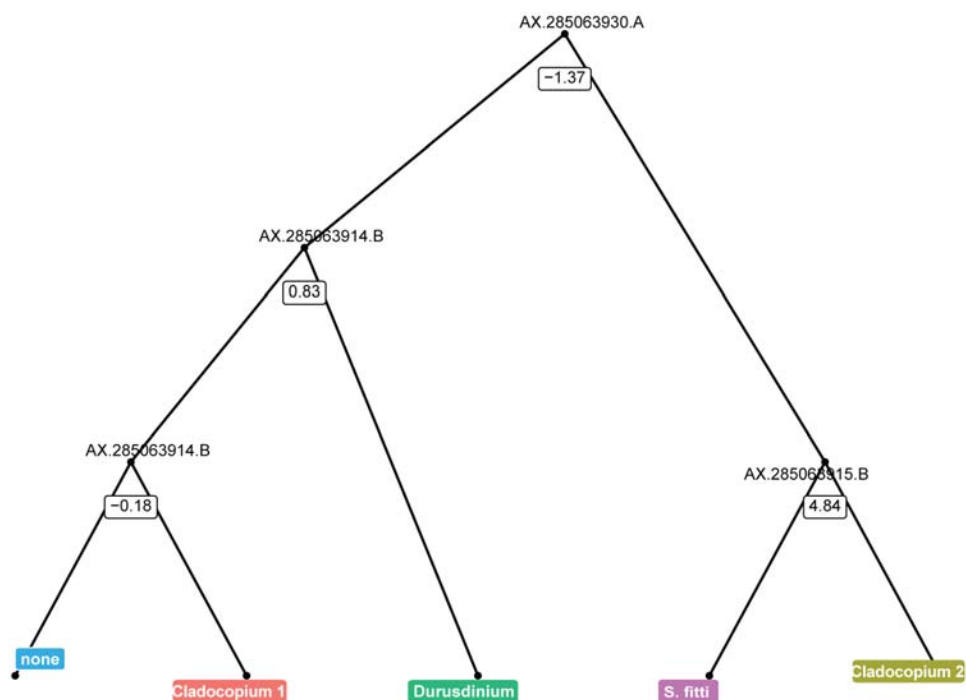



938 **Figure S7. Decision tree (A) and random forest tree (B) with the lowest error rate and**  
939 **maximum nodes for symbiont genera assignment.**

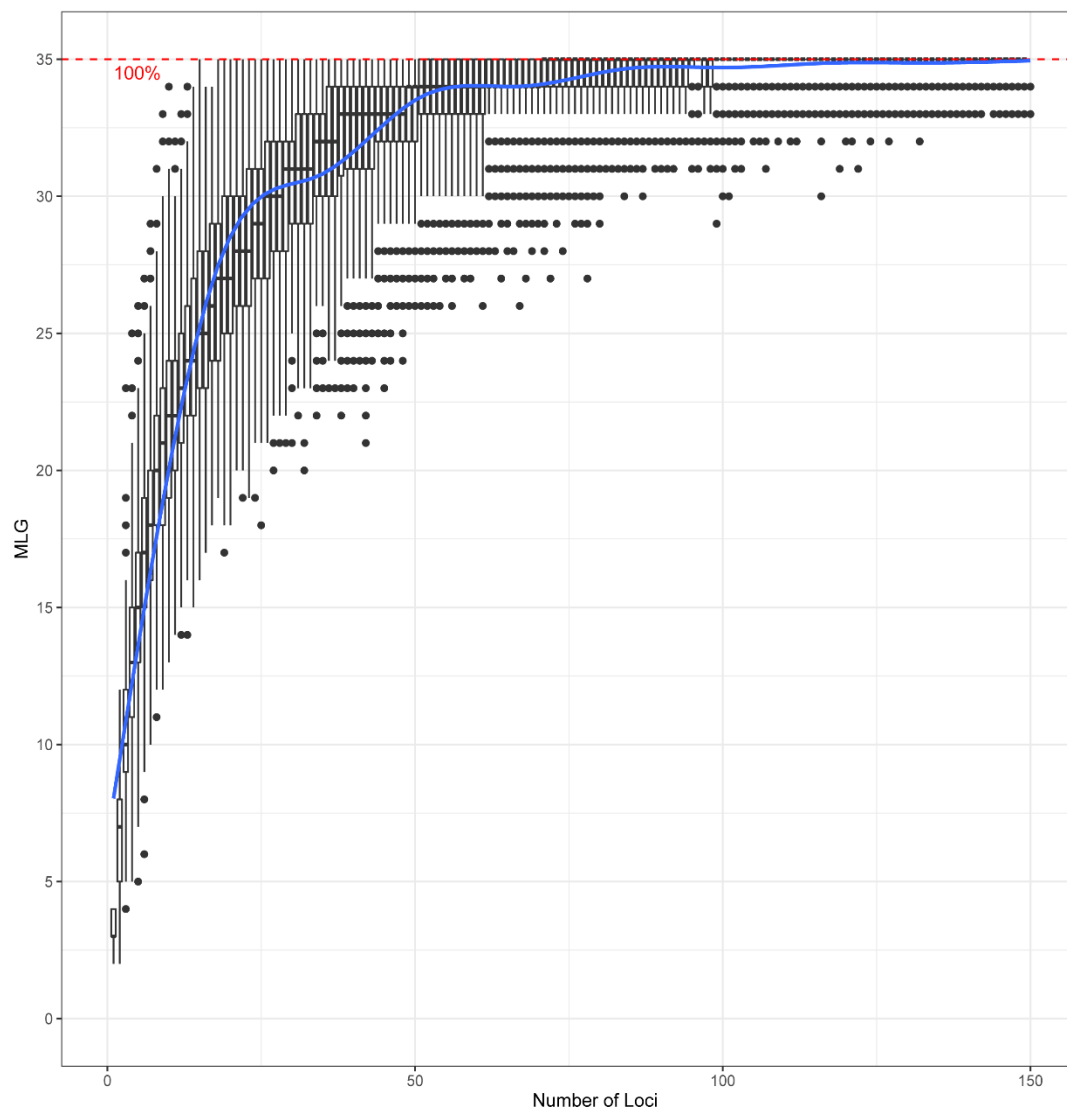

940  
941  
942 **Figure S8. Genotype accumulation curve of the Pacific samples.** The minimum number of  
943 loci required to recover 35 unique genet IDs. Boxplots are the results of the number of loci on  
944 the x-axis randomly sampled 100 times from all loci.

## 945 **References**

- 946 Adjeroud, M., and M. Tsuchiya, 1999 Genetic variation and clonal structure in the scleractinian  
947 coral *Pocillopora damicornis* in the Ryukyu Archipelago, southern Japan. *Marine*  
948 *Biology* 134 (4):753-760.
- 949 Affymetrix, 2007 BRLMM-P: a genotype calling method for the SNP 5.0 array. Affymetrix.
- 950 Afgan, E., D. Baker, B. Batut, M. Van Den Beek, D. Bouvier *et al.*, 2018 The Galaxy platform  
951 for accessible, reproducible and collaborative biomedical analyses: 2018 update. *Nucleic*  
952 *Acids Research* 46 (W1):W537-W544.
- 953 Alexander, D.H., J. Novembre, and K. Lange, 2009 Fast model-based estimation of ancestry in  
954 unrelated individuals. *Genome Research* 19 (9):1655-1664.
- 955 Ali, O.A., S.M. O'Rourke, S.J. Amish, M.H. Meek, G. Luikart *et al.*, 2016 RAD capture  
956 (Rapture): Flexible and efficient sequence-based genotyping. *Genetics* 202 (2):389.
- 957 Altshuler, D., V.J. Pollara, C.R. Cowles, W.J. Van Etten, J. Baldwin *et al.*, 2000 An SNP map of  
958 the human genome generated by reduced representation shotgun sequencing. *Nature* 407  
959 (6803):513-516.
- 960 Andras, J.P., N.L. Kirk, M.A. Coffroth, and C.D. Harvell, 2009 Isolation and characterization of  
961 microsatellite loci in *Symbiodinium* B1/B184, the dinoflagellate symbiont of the  
962 Caribbean sea fan coral, *Gorgonia ventalina*. *Molecular Ecology Resources* 9 (3):989-  
963 993.
- 964 Arif, C., C. Daniels, T. Bayer, E. Banguera-Hinestroza, A. Barbrook *et al.*, 2014 Assessing  
965 *Symbiodinium* diversity in scleractinian corals via next-generation sequencing-based  
966 genotyping of the ITS2 rDNA region. *Molecular Ecology* 23 (17):4418-4433.
- 967 Ayre, D.J., and T.P. Hughes, 2000 Genotypic diversity and gene flow in brooding and spawning  
968 corals along the Great Barrier Reef, Australia. *Evolution* 54 (5):1590-1605.
- 969 Baums, I., M. Devlin-Durante, N. Polato, D. Xu, S. Giri *et al.*, 2013 Genotypic variation  
970 influences reproductive success and thermal stress tolerance in the reef building coral,  
971 *Acropora palmata*. *Coral Reefs*:1-15.
- 972 Baums, I.B., A.C. Baker, S.W. Davies, A.G. Grottoli, C.D. Kenkel *et al.*, 2019 Considerations for  
973 maximizing the adaptive potential of restored coral populations in the western Atlantic.  
974 *Ecological Applications*.
- 975 Baums, I.B., M.K. Devlin-Durante, and T.C. LaJeunesse, 2014 New insights into the dynamics  
976 between reef corals and their associated dinoflagellate endosymbionts from population  
977 genetic studies. *Molecular Ecology* 23:4203-4215.
- 978 Baums, I.B., C.R. Hughes, and M.H. Hellberg, 2005a Mendelian microsatellite loci for the  
979 Caribbean coral *Acropora palmata*. *Marine Ecology - Progress Series* 288:115-127.
- 980 Baums, I.B., M.E. Johnson, M.K. Devlin-Durante, and M.W. Miller, 2010 Host population  
981 genetic structure and zooxanthellae diversity of two reef-building coral species along the  
982 Florida Reef Tract and wider Caribbean. *Coral Reefs* 29 (4):835-842.
- 983 Baums, I.B., M.W. Miller, and M.E. Hellberg, 2005b Regionally isolated populations of an  
984 imperiled Caribbean coral, *Acropora palmata*. *Molecular Ecology* 14 (5):1377-1390.
- 985 Baums, I.B., M.W. Miller, and M.E. Hellberg, 2006 Geographic variation in clonal structure in a  
986 reef building Caribbean coral, *Acropora palmata*. *Ecological Monographs* 76 (4):503-  
987 519.
- 988 Bongaerts, P., C. Riginos, R. Brunner, N. Englebert, S.R. Smith *et al.*, 2017 Deep reefs are not  
989 universal refuges: reseeded potential varies among coral species. *Science Advances* 3

- 990 (2):e1602373.
- 991 Chan, A.N., C.L. Lewis, K.L. Neely, and I.B. Baums, 2019 Fallen pillars: the past, present, and  
992 future population dynamics of a rare, specialist coral-algal symbiosis. *Frontiers in*  
993 *Marine Science* 6:218.
- 994 Chang, C.C., C.C. Chow, L.C. Tellier, S. Vattikuti, S.M. Purcell *et al.*, 2015 Second-generation  
995 PLINK: rising to the challenge of larger and richer datasets. *Gigascience* 4 (1):7.
- 996 Cingolani, P., A. Platts, L.L. Wang, M. Coon, T. Nguyen *et al.*, 2012 A program for annotating  
997 and predicting the effects of single nucleotide polymorphisms, SnpEff: SNPs in the  
998 genome of *Drosophila melanogaster* strain w1118; iso-2; iso-3. *Fly* 6 (2):80-92.
- 999 Danecek, P., A. Auton, G. Abecasis, C.A. Albers, E. Banks *et al.*, 2011 The variant call format  
1000 and VCFtools. *Bioinformatics* 27 (15):2156-2158.
- 1001 Darrier, B., J. Russell, S.G. Milner, P.E. Hedley, P.D. Shaw *et al.*, 2019 A comparison of  
1002 mainstream genotyping platforms for the evaluation and use of barley genetic resources.  
1003 *Frontiers in plant science* 10.
- 1004 Davies, P.S., 1991 Effect of daylight variations on the energy budgets of shallow-water corals.  
1005 *Marine Biology* 108 (1):137-144.
- 1006 Devlin-Durante, M.K., and I.B. Baums, 2017 Genome-wide survey of single-nucleotide  
1007 polymorphisms reveals fine-scale population structure and signs of selection in the  
1008 threatened Caribbean elkhorn coral, *Acropora palmata*. *PeerJ* 5:e4077.
- 1009 Drury, C., K.E. Dale, J.M. Panlilio, S.V. Miller, D. Lirman *et al.*, 2016 Genomic variation among  
1010 populations of threatened coral: *Acropora cervicornis*. *BMC Genomics* 17 (1):286.
- 1011 Fogarty, N.D., S.V. Vollmer, and D.R. Levitan, 2012 Weak Prezygotic Isolating Mechanisms in  
1012 Threatened Caribbean *Acropora* Corals. *PLoS ONE* 7 (2):e30486.
- 1013 Foster, N.L., I.B. Baums, and P.J. Mumby, 2007 Sexual vs. asexual reproduction in an ecosystem  
1014 engineer: the massive coral *Montastraea annularis*. *Journal of Animal Ecology* 76  
1015 (2):384-391.
- 1016 Franchini, P., D. Monné Parera, A.F. Kautt, and A. Meyer, 2017 quaddRAD: a new  
1017 high multiplexing and PCR duplicate removal ddRAD protocol produces novel  
1018 evolutionary insights in a nonradiating cichlid lineage. *Molecular Ecology* 26 (10):2783-  
1019 2795.
- 1020 Fukami, H., A.F. Budd, D.R. Levitan, J. Jara, R. Kersanach *et al.*, 2004 Geographic differences  
1021 in species boundaries among members of the *Montastraea annularis* complex based on  
1022 molecular and morphological markers. *Evolution* 58 (2):324-337.
- 1023 Fuller, Z.L., V.J. Mocellin, L. Morris, N. Cantin, J. Shepherd *et al.*, 2019 Population genetics of  
1024 the coral *Acropora millepora*: Towards a genomic predictor of bleaching.  
1025 *bioRxiv*:867754.
- 1026 Garrison, E., and G. Marth, 2012 Haplotype-based variant detection from short-read sequencing.  
1027 *arXiv preprint arXiv:1207.3907*.
- 1028 González, M., O. Rosado-Falcón, and J.D. Rodríguez, 2019 ssc: Semi-Supervised Classification  
1029 Methods. R package version 2.0.0.
- 1030 Grupstra, C.G., R. Coma, M. Ribes, K.P. Leydet, J.E. Parkinson *et al.*, 2017 Evidence for coral  
1031 range expansion accompanied by reduced diversity of *Symbiodinium* genotypes. *Coral*  
1032 *Reefs* 36 (3):981-985.
- 1033 Hemond, E.M., and S.V. Vollmer, 2010 Genetic diversity and connectivity in the threatened  
1034 staghorn coral (*Acropora cervicornis*) in Florida. *PloS One* 5 (1):e8652.
- 1035 Hoadley, K.D., A.M. Lewis, D.C. Wham, D.T. Pettay, C. Grasso *et al.*, 2019 Host-symbiont

- 1036 combinations dictate the photo-physiological response of reef-building corals to thermal  
1037 stress. *Scientific Reports* 9 (1):1-15.
- 1038 Hoffberg, S.L., T.J. Kieran, J.M. Catchen, A. Devault, B.C. Faircloth *et al.*, 2016 RADcap:  
1039 sequence capture of dual-digest RADseq libraries with identifiable duplicates and  
1040 reduced missing data. *Molecular Ecology Resources* 16 (5):1264-1278.
- 1041 Hong, H., Z. Su, W. Ge, L. Shi, R. Perkins *et al.*, 2008 Assessing batch effects of genotype  
1042 calling algorithm BRLMM for the Affymetrix GeneChip Human Mapping 500 K array  
1043 set using 270 HapMap samples in *BMC Bioinformatics*. BioMed Central.
- 1044 Hong, H., L. Xu, J. Liu, W.D. Jones, Z. Su *et al.*, 2012 Technical reproducibility of genotyping  
1045 SNP arrays used in genome-wide association studies. *PloS One* 7 (9):e44483.
- 1046 Japaud, A., C. Bouchon, H. Magalon, and C. Fauvelot, 2019 Geographic distances and ocean  
1047 currents influence Caribbean *Acropora palmata* population connectivity in the Lesser  
1048 Antilles. *Conservation Genetics* 20 (3):447-466.
- 1049 Kamvar, Z.N., J.C. Brooks, and N.J. Grünwald, 2015 Novel R tools for analysis of genome-wide  
1050 population genetic data with emphasis on clonality. *Frontiers in genetics* 6:208.
- 1051 Kamvar, Z.N., J.F. Tabima, and N.J. Grünwald, 2014 Poppr: an R package for genetic analysis of  
1052 populations with clonal, partially clonal, and/or sexual reproduction. *PeerJ* 2:e281.
- 1053 Kitchen, S.A., A. Ratan, O.C. Bedoya-Reina, R. Burhans, N.D. Fogarty *et al.*, 2019 Genomic  
1054 variants among threatened *Acropora* corals. *G3: Genes/Genomes/Genetics*:g3.400125.402019.
- 1055
- 1056 Knaus, B.J., and N.J. Grünwald, 2017 vcfr: a package to manipulate and visualize variant call  
1057 format data in R. *Molecular Ecology Resources* 17 (1):44-53.
- 1058 Kopelman, N.M., J. Mayzel, M. Jakobsson, N.A. Rosenberg, and I. Mayrose, 2015 Clumpak: a  
1059 program for identifying clustering modes and packaging population structure inferences  
1060 across K. *Molecular Ecology Resources* 15 (5):1179-1191.
- 1061 Kuhn, M., 2008 Building predictive models in R using the caret package. *Journal of statistical*  
1062 *software* 28 (5):1-26.
- 1063 Kumar, S., G. Stecher, M. Li, C. Knyaz, and K. Tamura, 2018 MEGA X: molecular evolutionary  
1064 genetics analysis across computing platforms. *Molecular Biology and Evolution* 35  
1065 (6):1547-1549.
- 1066 Lachance, J., and S.A. Tishkoff, 2013 SNP ascertainment bias in population genetic analyses:  
1067 why it is important, and how to correct it. *Bioessays* 35 (9):780-786.
- 1068 LaJeunesse, T.C., 2001 Investigating the biodiversity, ecology, and phylogeny of endosymbiotic  
1069 dinoflagellates in the genus *Symbiodinium* using the ITS region: in search of a “species”  
1070 level marker. *Journal of Phycology* 37 (5):866-880.
- 1071 LaJeunesse, T.C., 2002 Diversity and community structure of symbiotic dinoflagellates from  
1072 Caribbean coral reefs. *Marine Biology* 141 (2):387-400.
- 1073 Lamarck, J.B.P.A.d., 1816 *Histoire Naturelle des Animaux sans Vertebres*. Paris: Verdier.
- 1074 Lee, Y.G., N. Jeong, J.H. Kim, K. Lee, K.H. Kim *et al.*, 2015 Development, validation and  
1075 genetic analysis of a large soybean SNP genotyping array. *The Plant Journal* 81 (4):625-  
1076 636.
- 1077 Levitan, D.R., N.D. Fogarty, J. Jara, K.E. Lotterhos, and N. Knowlton, 2011 Genetic, spatial, and  
1078 temporal components of precise spawning synchrony in reef building corals of the  
1079 *Montastraea annularis* species complex. *Evolution: International Journal of Organic*  
1080 *Evolution* 65 (5):1254-1270.
- 1081 Li, H., 2011 A statistical framework for SNP calling, mutation discovery, association mapping

- 1082 and population genetical parameter estimation from sequencing data. *Bioinformatics* 27  
1083 (21):2987-2993.
- 1084 Liew, Y.J., M. Aranda, and C.R. Woolstra, 2016 Reefgenomics. Org-a repository for marine  
1085 genomics data. *Database* 2016.
- 1086 Lirman, D., S. Schopmeyer, V. Galvan, C. Drury, A.C. Baker *et al.*, 2014 Growth dynamics of  
1087 the threatened Caribbean staghorn coral *Acropora cervicornis*: influence of host  
1088 genotype, symbiont identity, colony size, and environmental setting. *PloS One* 9  
1089 (9):e107253.
- 1090 Liu, H., T.G. Stephens, R.A. González-Pech, V.H. Beltran, B. Lapeyre *et al.*, 2018 *Symbiodinium*  
1091 genomes reveal adaptive evolution of functions related to coral-dinoflagellate symbiosis.  
1092 *Communications Biology* 1 (1):95.
- 1093 Malomane, D.K., C. Reimer, S. Weigend, A. Weigend, A.R. Sharifi *et al.*, 2018 Efficiency of  
1094 different strategies to mitigate ascertainment bias when using SNP panels in diversity  
1095 studies. *BMC Genomics* 19 (1):22.
- 1096 Marrano, A., P.J. Martínez-García, L. Bianco, G.M. Sideli, E.A. Di Pierro *et al.*, 2019 A new  
1097 genomic tool for walnut (*Juglans regia* L.): development and validation of the  
1098 high-density Axiom™ *J. regia* 700K SNP genotyping array. *Plant Biotechnology*  
1099 *Journal* 17 (6):1027-1036.
- 1100 Meyer, E., S. Davies, S. Wang, B.L. Willis, D. Abrego *et al.*, 2009 Genetic variation in responses  
1101 to a settlement cue and elevated temperature in the reef-building coral *Acropora*  
1102 *millepora*. *Marine Ecology Progress Series* 392:81-92.
- 1103 Milborrow, S., 2019 rpart. plot: Plot 'rpart' Models: An Enhanced Version of 'plot. rpart'. R  
1104 package version 3.0.8.
- 1105 Miller, D.J., and M.J.H. Van Oppen, 2003 A 'fair go' for coral hybridization. *Molecular Ecology*  
1106 12:805-807.
- 1107 Miller, K.J., and D.J. Ayre, 2004 The role of sexual and asexual reproduction in structuring high  
1108 latitude populations of the reef coral *Pocillopora damicornis*. *Heredity* 92 (6):557-568.
- 1109 Moragues, M., J. Comadran, R. Waugh, I. Milne, A. Flavell *et al.*, 2010 Effects of ascertainment  
1110 bias and marker number on estimations of barley diversity from high-throughput SNP  
1111 genotype data. *Theoretical and Applied Genetics* 120 (8):1525-1534.
- 1112 Muscatine, L., and E. Cernichiaro, 1969 Assimilation of photosynthetic products of zooxanthellae  
1113 by a reef coral. *Biological Bulletin* 137 (3):506-523.
- 1114 Neigel, J.E., and J.C. Avise, 1983 Clonal diversity and population structure in a reef-building  
1115 coral, *Acropora cervicornis* : Self-recognition analysis and demographic interpretation.  
1116 *Evolution* 37 (3):437-453.
- 1117 Palti, Y., G. Gao, S. Liu, M. Kent, S. Lien *et al.*, 2015 The development and characterization of a  
1118 57 K single nucleotide polymorphism array for rainbow trout. *Molecular Ecology*  
1119 *Resources* 15 (3):662-672.
- 1120 Palumbi, S.R., S. Vollmer, S. Romano, T. Oliver, and J. Ladner, 2012 The role of genes in  
1121 understanding the evolutionary ecology of reef building corals. *Evolutionary Ecology* 26  
1122 (2):317-335.
- 1123 Parkinson, J.E., and I.B. Baums, 2014 The extended phenotypes of marine symbioses: ecological  
1124 and evolutionary consequences of intraspecific genetic diversity in coral-algal  
1125 associations. *Frontiers in Microbiology* 5.
- 1126 Pettay, D.T., and T.C. LaJeunesse, 2007 Microsatellites from clade B *Symbiodinium* spp.  
1127 specialized for Caribbean corals in the genus *Madracis*. *Molecular Ecology Notes* 7

- 1128 (6):1271-1274.
- 1129 Pettay, D.T., and T.C. LaJeunesse, 2009 Microsatellite loci for assessing genetic diversity,  
1130 dispersal and clonality of coral symbionts in 'stress-tolerant' clade D *Symbiodinium*.  
1131 *Molecular Ecology Resources* 9 (3):1022-1025.
- 1132 Pinzón, J., H. Reyes-Bonilla, I. Baums, and T. LaJeunesse, 2012 Contrasting clonal structure  
1133 among *Pocillopora* (Scleractinia) communities at two environmentally distinct sites in  
1134 the Gulf of California. *Coral Reefs* 3:765-777.
- 1135 Pinzón, J.H., M.K. Devlin-Durante, M.X. Weber, I.B. Baums, and T.C. LaJeunesse, 2011  
1136 Microsatellite loci for *Symbiodinium* A3 (*S. fitti*) a common algal symbiont among  
1137 Caribbean *Acropora* (stony corals) and Indo-Pacific giant clams (*Tridacna*). *Conservation*  
1138 *Genetics Resources* 3 (1):45-47.
- 1139 Pochon, X., H.M. Putnam, F. Burki, and R.D. Gates, 2012 Identifying and characterizing  
1140 alternative molecular markers for the symbiotic and free-living dinoflagellate genus  
1141 *Symbiodinium*. *PloS One* 7 (1):e29816.
- 1142 Polato, N.R., N.S. Altman, and I.B. Baums, 2013 Variation in the transcriptional response of  
1143 threatened coral larvae to elevated temperatures. *Molecular Ecology*.
- 1144 Porto-Hannes, I., A.L. Zubillaga, T.L. Shearer, C. Bastidas, C. Salazar *et al.*, 2014 Population  
1145 structure of the corals *Orbicella faveolata* and *Acropora palmata* in the Mesoamerican  
1146 Barrier Reef System with comparisons over Caribbean basin-wide spatial scale. *Marine*  
1147 *Biology*:1-18.
- 1148 Prevosti, A., J. Ocana, and G. Alonso, 1975 Distances between populations of *Drosophila*  
1149 *subobscura*, based on chromosome arrangement frequencies. *Theoretical and Applied*  
1150 *Genetics* 45 (6):231-241.
- 1151 Quinlan, A.R., and I.M. Hall, 2010 BEDTools: a flexible suite of utilities for comparing genomic  
1152 features. *Bioinformatics* 26 (6):841-842.
- 1153 Randall, C.J., and A.M. Szmant, 2009 Elevated Temperature Affects Development, Survivorship,  
1154 and Settlement of the Elkhorn Coral, *Acropora palmata* (Lamarck 1816). *Biological*  
1155 *Bulletin* 217 (3):269-282.
- 1156 RCoreTeam, 2017 R: A language and environment for statistical computing [Online]. R  
1157 Foundation for Statistical Computing, Vienna, Austria.
- 1158 Reimer, J.D., K. Takishita, and T. Maruyama, 2006 Molecular identification of symbiotic  
1159 dinoflagellates (*Symbiodinium* spp.) from *Palythoa* spp.(Anthozoa: Hexacorallia) in  
1160 Japan. *Coral Reefs* 25 (4):521-527.
- 1161 Ripley, B., 2002 Modern applied statistics with S. Springer, New York.
- 1162 Santos, S.R., and M.A. Coffroth, 2003 Molecular genetic evidence that dinoflagellates belonging  
1163 to the genus *Symbiodinium* Freudenthal are haploid. *The Biological Bulletin* 204 (1):10-  
1164 20.
- 1165 Shinzato, C., E. Shoguchi, T. Kawashima, M. Hamada, K. Hisata *et al.*, 2011 Using the *Acropora*  
1166 *digitifera* genome to understand coral responses to environmental change. *Nature* 476  
1167 (7360):320-323.
- 1168 Shoguchi, E., G. Beedesse, I. Tada, K. Hisata, T. Kawashima *et al.*, 2018 Two divergent  
1169 *Symbiodinium* genomes reveal conservation of a gene cluster for sunscreen biosynthesis  
1170 and recently lost genes. *BMC Genomics* 19 (1):458.
- 1171 Stoddart, J.A., 1983 Asexual production of planulae in the coral *Pocillopora damicornis*. *Marine*  
1172 *Biology* 76:279-284.
- 1173 Takishita, K., M. Ishikura, K. Koike, and T. Maruyama, 2003 Comparison of phylogenies based

- 1174 on nuclear-encoded SSU rDNA and plastid-encoded psbA in the symbiotic dinoflagellate  
1175 genus *Symbiodinium*. *Phycologia* 42 (3):285-291.
- 1176 Therneau, T., and B. Atkinson, 2019 rpart: Recursive Partitioning and Regression Trees.
- 1177 Thornhill, D.J., T.C. LaJeunesse, D.W. Kemp, W.K. Fitt, and G.W. Schmidt, 2006 Multi-year,  
1178 seasonal genotypic surveys of coral-algal symbioses reveal prevalent stability or post-  
1179 bleaching reversion. *Marine Biology* 148 (4):711-722.
- 1180 van Oppen, M.J.H., B.L. Willis, J.A. van Vugt, and D.J. Miller, 2000 Examination of species  
1181 boundaries in the *Acropora cervicornis* group (Scleractinia, Cnidaria) using nuclear DNA  
1182 sequence analyses. *Molecular Ecology* 9:1363-1373.
- 1183 Veron, J.E.N., 2000 *Corals of the World*.
- 1184 Vollmer, S.V., and S.R. Palumbi, 2002a Hybridization and the evolution of reef coral diversity.  
1185 *Science* 296:2023-2025.
- 1186 Vollmer, S.V., and S.R. Palumbi, 2002b Hybridization and the evolution of reef coral diversity.  
1187 *Science* 296 (5575):2023-2025.
- 1188 Vollmer, S.V., and S.R. Palumbi, 2007 Restricted gene flow in the Caribbean staghorn coral  
1189 *Acropora cervicornis*: Implications for the recovery of endangered reefs. *Journal of*  
1190 *Heredity* 98 (1):40-50.
- 1191 Wallace, C.C., 1999 *Staghorn corals of the world: a revision of the coral genus Acropora*  
1192 *(Scleractinia; Astrocoeniina; Acroporidae) worldwide, with emphasis on morphology,*  
1193 *phylogeny and biogeography*: CSIRO publishing.
- 1194 Wham, D.C., D.T. Pettay, and T.C. LaJeunesse, 2011 Microsatellite loci for the host-generalist  
1195 “zooxanthella” *Symbiodinium trenchi* and other Clade D *Symbiodinium*. *Conservation*  
1196 *Genetics Resources* 3 (3):541-544.
- 1197 Whitaker, K., 2006 Genetic evidence for mixed modes of reproduction in the coral *Pocillopora*  
1198 *damicornis* and its effect on population structure. *Marine Ecology-Progress Series*  
1199 306:115-124.
- 1200 Wilson, K., Y. Li, V. Whan, S. Lehnert, K. Byrne *et al.*, 2002 Genetic mapping of the black tiger  
1201 shrimp *Penaeus monodon* with amplified fragment length polymorphism. *Aquaculture*  
1202 204 (3-4):297-309.
- 1203 Zheng, X., D. Levine, J. Shen, S.M. Gogarten, C. Laurie *et al.*, 2012 A high-performance  
1204 computing toolset for relatedness and principal component analysis of SNP data.  
1205 *Bioinformatics* 28 (24):3326-3328.

1206
